1 **Primary health care improvement in Benin: Cocreating an evidence-informed policy framework to guide the**  
2 **practices of primary care physicians**

3 **Cocreating a policy framework to guide the primary care physicians' practices in Benin**

4

5 Kéfilath Bello<sup>1,2,3\*</sup>, Bart Criel<sup>2</sup>, Jean-Paul Dossou<sup>1</sup>, Djimon Marcel Zannou<sup>4</sup>, Jan De Lepeleire<sup>3</sup>

6

7

8

9 1 Centre de Recherche en Reproduction Humaine et en Démographie, Cotonou, Benin

10 2 Department of Public Health, Institute of Tropical Medicine, Antwerp, Belgium

11 3 Department of Public Health and Primary Care, General Practice, Katholieke Universiteit Leuven,  
12 Belgium

13 4 Faculté des Sciences de la Santé, Université d'Abomey-Calavi, Benin

14

15

16

17 Corresponding author: Kéfilath Bello, [kefilath@gmail.com](mailto:kefilath@gmail.com) , +22996217450

18

19

20

21

22

23

24

25

26

**NOTE: This preprint reports new research that has not been certified by peer review and should not be used to guide clinical practice.**

27 **Abstract**

28 **Introduction**

29 In Benin, policies for guiding the practices of primary care physicians (PCPs) are sparse and  
30 incomplete. This leads to sub-optimal use of these relatively rare human resources and reduces their  
31 potential contribution to people’s health and well-being. In this study, a policy framework guiding  
32 PCPs’ practice in Benin is developed in cooperation with key stakeholders.

33 **Methods**

34 The cocreation was a long-term process spread over several years, culminating in a two-day  
35 workshop in Cotonou (Benin’s capital city) in October 2022. The core principles of a successful  
36 cocreation process were respected: a clear definition of goals, the participation of all relevant  
37 stakeholders, including community members, and evidence-informed discussions.

38 **Results**

39 The resulting policy framework includes four overarching dimensions: first, the objectives assigned  
40 to PCPs in Benin; second, their roles and related activities; third, their professional identity; and  
41 fourth, the governance arrangements guiding their practices. The policy framework provided  
42 concrete recommendations for these dimensions based on the Benin context and international  
43 evidence.

44 **Conclusion**

45 The cocreation process was instrumental in developing an evidence-informed and consensual policy  
46 framework guiding PCPs' practices in Benin. The framework may be relevant for other West African  
47 countries but must be customised to each country’s context.

## 48 **Introduction**

49 In Benin, the burden of disease is still high, with, e.g. a maternal mortality ratio in 2020 of 523  
50 deaths per 100,000 live births versus 531 and 223 deaths per 100,000 live births in the whole of  
51 Africa and in the world, respectively [1]. Similarly, in 2021, the country had a high under-five  
52 mortality rate at 83.52 deaths per 1,000 live births, and its health services coverage index was  
53 among the lowest in Africa, at 38 out of 100 in 2021 [1].

54 This situation can be considerably improved with the effective implementation of Primary Health  
55 Care (PHC) [2], which includes integrated and quality health services to meet people's health needs  
56 (known as "primary care"), addressing the broader determinants of health through multisectoral  
57 policy and action, and empowering individuals, families, and communities to take charge of their  
58 health [3]. An effective PHC system requires a sufficient, well-distributed and well-performing health  
59 workforce [4,5], especially at the interface between the community and the health services system –  
60 i.e. first-line health services - where most of the population health needs should be addressed [3,4].

61 For decades, the provision of primary care in Benin, as in many African countries, has been  
62 delegated to non-physicians because of the limited number of physicians [6,7]. However, the ratio of  
63 physicians in Benin has gradually increased, from 0.6 to 1.5 physicians per 10.000 inhabitants  
64 between 2010 and 2017 [8,9]. This increase, combined with the development of the private sector  
65 and limited access to postgraduate training opportunities, increased the presence of physicians  
66 working at the primary care level. Because of their more elaborate university training than non-  
67 physicians, one would naturally assume that the increased presence of Primary Care Physicians  
68 (PCPs) would improve primary care delivery. Indeed, some studies, including one in Benin, indicated  
69 that PCPs could potentially improve primary care performance in Africa [10–12]. However, a scoping  
70 review [13] conducted by our team in 2020 on PCPs' practices in Sub-Saharan Africa showed that this  
71 improvement should not be taken for granted. When poorly regulated, PCPs may actually fail to  
72 improve care quality. They also struggle to ensure certain key principles of PHC, such as accessibility,  
73 continuity of care, patient-centeredness, or responsiveness to people's health needs [13]. Moreover,

74 in contexts where non-physicians already substantially contribute to primary care delivery [6,7],  
75 PCPs need to find their place in the ecosystem of primary care in order to avoid tensions,  
76 redundancies or even deviances, for instance, engaging in activities situated outside their  
77 competencies in order to prove their "superiority" [14,15]. Another contextual particularity is that  
78 PCPs in Benin need to work with fewer resources than their peers in other parts of the world. In  
79 2020, Benin's current health expenditure per capita was 32 US dollars. In comparison, Belgium,  
80 Cuba, Brazil, South Africa, and Thailand spent 5009, 1186, 701, 490, and 305 US dollars in the same  
81 year [1].

82 All these issues call for well-thought policies steering PCPs' practices to optimise their contribution  
83 to PHC. Indeed, one of the four strategic levers recommended by WHO's operational framework for  
84 PHC is to develop sound policy frameworks that will support actions in vital areas [16]. Policy  
85 frameworks are documents that describe a set of goals, procedures, and principles that might guide  
86 more detailed policies and interventions on a given issue [17]. In Benin, a sound policy framework is  
87 timely, given that PCPs are still a relatively rare and expensive resource, even if they are on the rise.  
88 A *laissez-faire* policy would thus lead to inefficiencies in utilising this resource, as suggested by a  
89 study conducted in 2020 in four health districts in Benin [18]. However, Benin lacks, like many other  
90 African countries, a clear, explicit and contextualised policy framework to support PCPs [13].

91 The present study aims to close this gap by developing, in collaboration with key stakeholders, a  
92 policy framework to guide the PCPs' practices in Benin. PCP's practices are defined by the services  
93 provided by the PCPs, their individual characteristics, the features of their workplace, and the team  
94 (if any) within which they operate. The research question that guided us was: "what should be the  
95 content of a policy framework guiding the practices of PCPs in Benin, taking into account the  
96 specificities of the country's context?"

97

98 **Methods**

## 99 Definition and principles of cocreation

100 To ensure that this policy framework is well connected to Benin's health policy and systems  
101 processes, we used a cocreation approach for its development. Cocreation is a process where  
102 relevant stakeholders (researchers, policymakers, practitioners, end-users) work together to  
103 generate evidence on a given topic, diagnose related problems and their root causes, and formulate  
104 potential solutions [19,20]. As such, cocreation helps ensure that the evidence produced is relevant  
105 to local priorities and that the solutions proposed and the decisions taken are contextualised,  
106 connected to ongoing policy processes, feasible, acceptable, and endorsed by many stakeholders.  
107 In the literature, cocreation is related to (and sometimes used interchangeably with) several  
108 concepts. For instance, in its series on increasing the impact of health research through  
109 coproduction of knowledge, the BMJ used the term "coproduction" to designate a collaborative  
110 model of research where researchers work in partnership with knowledge users to identify a  
111 problem and produce knowledge, sharing power and responsibilities from the start to the end of the  
112 research [21]. Another related concept is "policy dialogue", which is an iterative process considering  
113 both the technical and political aspects of a problem, involving evidence-based and politically  
114 sensitive discussions, including a broad range of stakeholders, and having a concrete purpose or  
115 outcome in mind [22]. Thus, policy dialogue and cocreation share many similarities, especially  
116 because they both seek to ensure that the best available evidence informs policy and practice  
117 decisions and imply a sustainable partnership between researchers, policymakers, health systems  
118 users and other stakeholders [21–24].

119 No matter the terminology used, a cocreation process should follow some principles to be  
120 successful. First, the goals of the cocreation should be clearly defined from the onset and  
121 understood by all stakeholders [20,22,25]. The cocreation process should also be inclusive, with  
122 trusted relationships and shared power among the stakeholders [22,24,26,27]. The discussions and  
123 decisions during cocreation should be informed by evidence [22,28,29], with the stakeholders'  
124 experiences and perspectives as valued as the evidence provided by scientific research [24,28,30].

125 The discussions should also be well-prepared, ensuring that the relevant stakeholders are present  
126 and that the evidence needed is shared timely with the stakeholders in adequate formats [28,31].  
127 Finally, a successful cocreation needs skilled and dedicated facilitators and relevant tools (relevant  
128 collaborative tools, knowledge products, etc.) [28,30,31].

### 129 [Conceptual framework and steps of the cocreation process](#)

130 Based on the principles and steps described above, we developed a conceptual framework to guide  
131 our cocreation process (see Figure 1).

#### 132 **Fig 1. Conceptual framework for the cocreation process**

133 At the step of problem identification, we conducted a scoping review [13], which helped us better  
134 understand the practices of PCPs in sub-Saharan Africa. We were then able to properly formulate  
135 the problem we were trying to solve, i.e. "the PCPs in most sub-Saharan African countries are not  
136 reaching their potential for improving PHC and there is little policy guidance for guiding their  
137 practices". We could also clearly formulate the goal of the cocreation, which is to develop a policy  
138 framework to guide the PCPs' practices for PHC improvement in Benin. Another output of the  
139 scoping review was an analytical framework for analysing the PCPs' practices in further stages and  
140 guiding the development of the policy framework.

141 For the problem analysis step, we conducted three mixed methods studies between December 2019  
142 and July 2022 in five purposively selected health districts in Benin: Cotonou 2 and 3 (Cot 2-3),  
143 Cotonou 5 (Cot 5), Ouidah-Kpomassè-Tori (OKT), Parakou-N'Dali (PN) and Nikki-Kalalé-Pèrèrè (NKP).  
144 The first study described and categorised the PCPs' practices in Benin [18]. The second study learnt  
145 from the PCPs' experiences with the COVID-19 pandemic to further understand the strengths and  
146 weaknesses of their practices, especially during crises [10]. In the third study, we analysed the  
147 performance of 8 interesting cases of PCPs' practices, selected based on their performance levels  
148 and other characteristics, to understand the factors that influence these practices [32]. These three  
149 studies allowed us to confirm the reality and magnitude of the problem in Benin (i.e., the sub-  
150 optimal performance of the PCPs), identify the root causes, and understand the contextual

151 specificities of the problem. The problem analysis was finalised during a cocreation workshop  
 152 described below.  
 153 At the step of identification and prioritisation of relevant interventions, we used information from  
 154 the third empirical study described above and information from the cocreation workshop (see S1  
 155 file). The empirical study on the PCPs' performance helped us to find potential levers of actions that  
 156 could be considered for the policy framework. The cocreation workshop was a two-day workshop in  
 157 Cotonou organised by the research team. In this workshop, a wide range of stakeholders from Benin  
 158 (see table 1) worked collaboratively to analyse the issues identified in the PCPs' practices in Benin,  
 159 propose solutions, and reflect on various aspects of the policy framework. Two participants from  
 160 Togo and Guinea were invited, and the discussions extended to the West African context. However,  
 161 most recommendations focused on Benin's context.

162 *Table 1: Overview of the stakeholders engaged during the cocreation process*

| <b>Cocreation activities<br/>(Period of the activity)</b> | <b>No. of<br/>participants</b> | <b>Profile of participants</b>                                                                                                                                                                                                                                                                                                                                                    |
|-----------------------------------------------------------|--------------------------------|-----------------------------------------------------------------------------------------------------------------------------------------------------------------------------------------------------------------------------------------------------------------------------------------------------------------------------------------------------------------------------------|
| Study 1 (5 December 2019 to 15 August 2020)               | 155                            | <ul style="list-style-type: none"> <li>• PCPs who participated in a survey, of whom 21 also participated in IDI</li> </ul>                                                                                                                                                                                                                                                        |
| Study 2 (18 April 2020 to 15 August 2020).                | 90                             | <ul style="list-style-type: none"> <li>• PCPs who participated in a survey, of whom 14 also participated in IDI</li> </ul>                                                                                                                                                                                                                                                        |
| Study 3 (19 April 2022 to 7 June 2022)                    | 157                            | <ul style="list-style-type: none"> <li>• PCPs (IDI participants): n=9</li> <li>• Non-physician PHC workers (IDI participants): n=9</li> <li>• Non-physician PHC workers (FGD participants): n=54</li> <li>• Patients (IDI participants): n= 16</li> <li>• Other community members (FGD participants): n=63</li> <li>• Local health authorities (IDI participants): n=6</li> </ul> |

|                                                                 |            |                                                                                                                                                                                                                                                                                                                                                                                                                                                                                                                                                                                 |
|-----------------------------------------------------------------|------------|---------------------------------------------------------------------------------------------------------------------------------------------------------------------------------------------------------------------------------------------------------------------------------------------------------------------------------------------------------------------------------------------------------------------------------------------------------------------------------------------------------------------------------------------------------------------------------|
| <p>Cocreation workshop (25 October 2022 to 26 October 2022)</p> | <p>26</p>  | <ul style="list-style-type: none"> <li>• Policymakers from the Ministry of Health (n=5, including 1 from Togo)</li> <li>• Policymakers from the Ministry of Social Affairs (n=1)</li> <li>• Civil society (n=3)</li> <li>• Development partners (n=4)</li> <li>• Health providers organisations/all cadres from the private sector (n=3)</li> <li>• Health providers organisations/non-Physicians (n=1)</li> <li>• Health providers organisations/physicians (n=3, including 1 from Guinea)</li> <li>• Local health authority (n=4)</li> <li>• Medical schools (n=2)</li> </ul> |
| <p>Informal stakeholders- engagement activities</p>             | <p>N/A</p> | <ul style="list-style-type: none"> <li>• Policymakers at the national level (n=6, including 5 from the Ministry of Health and 1 from an international organisation)</li> <li>• Study participants cited above</li> </ul>                                                                                                                                                                                                                                                                                                                                                        |

163 The last step was the elaboration of the policy framework. After the workshop, the research team  
 164 produced a draft of the policy framework, integrating the workshop results and those of the  
 165 empirical studies (S2 file). The team also used a non-systematic literature review (including several  
 166 policy documents, intervention reports and peer-reviewed articles) to look for good practices to  
 167 enrich the policy framework. The draft policy framework was then discussed among a group of  
 168 researchers and public health practitioners using a nominal group technique [33]. The refined  
 169 framework obtained after this exercise was shared with all participants at the workshop and  
 170 policymakers for feedback.

171 [Ensuring the quality of the cocreation process](#)

172 We strived to follow the principles of a successful cocreation process.  
 173 The scoping review was helpful to ensure a good definition of the problem and the goal of the  
 174 cocreation. The research team elaborated a concept note that clearly explained the workshop's  
 175 objectives and was shared with the stakeholders before the workshop.



176 To ensure inclusivity, trusted relationships, and shared power, we set up a long-term stakeholder  
177 engagement from the outset of the cocreation process. This includes several in-person discussions  
178 on research methodologies and preliminary results with PHC policymakers at the national level and  
179 sharing the results and relevant resources with the PCPs participating in the various studies. The  
180 results were shared in the format of short oral presentations, sometimes supported by a  
181 PowerPoint, an evidence brief with infographics, and research syntheses sent via email and  
182 WhatsApp to various stakeholders. This stakeholder engagement helped us gather regular feedback  
183 and build ownership of the process. An important aspect to mention here is the fact that the third  
184 empirical study provided an opportunity to gather the viewpoints of the patients and community  
185 members. These viewpoints were shared with the participants of the cocreation workshop. Table 1  
186 provides an overview of the stakeholders engaged throughout the cocreation process.

187 The cocreation process was also informed by evidence as the discussions among the stakeholders  
188 and the development of the policy framework was largely informed by the empirical studies  
189 conducted in Benin, an extensive literature review, and experiences shared by the workshop  
190 participants.

191 Finally, a team of facilitators, led by KB and supervised by BC, JDL and MDZ, carefully prepared the  
192 cocreation workshop. During the workshop, we combined oral presentations, plenary discussions,  
193 and group work. Various techniques were used to gather participants' ideas and prioritise policy  
194 options, including brainstorming, facilitated group discussions, and a world café (where groups  
195 rotated among three discussion tables akin to café settings to examine various issues). The key  
196 issues discussed are presented in Table 2. We also allocated more than half of the workshop time to  
197 cocreation activities and discussions.

198 *Table 2: Key issues discussed during the cocreation workshop*

| Themes of the group discussions | Guiding questions/instructions | Facilitation technique used |
|---------------------------------|--------------------------------|-----------------------------|
|                                 |                                |                             |

|                                                                                                  |                                                                                                                                                                                                                                                                                                                                                                                                                                                                                                                                                       |                                                                                                                                                                                                                                                                                                  |
|--------------------------------------------------------------------------------------------------|-------------------------------------------------------------------------------------------------------------------------------------------------------------------------------------------------------------------------------------------------------------------------------------------------------------------------------------------------------------------------------------------------------------------------------------------------------------------------------------------------------------------------------------------------------|--------------------------------------------------------------------------------------------------------------------------------------------------------------------------------------------------------------------------------------------------------------------------------------------------|
| <p>Root causes analysis of the problematic issues identified in the PCPs' practices in Benin</p> | <ul style="list-style-type: none"> <li>Based on the studies' results presented in the plenary, identify the root causes of the issues identified concerning the PCPs' practices in Benin—use of the "5 whys" approach.</li> </ul>                                                                                                                                                                                                                                                                                                                     | <ul style="list-style-type: none"> <li>Group discussions facilitated by research team members. The facilitators started by asking why the identified issue was observed and then, from the answers of the participants, drilled down into successive "whys" to the most distal cause.</li> </ul> |
| <p>Objectives, values and principles of the PCPs' practices in West Africa</p>                   | <p>Based on the root causes analysis and your knowledge of the West African context, answer the following questions:</p> <ul style="list-style-type: none"> <li>What should be the objectives of the PCPs' practices in West Africa?</li> <li>Which outcomes should we expect from a first-line health facility with a PCP?</li> <li>What should be the performance criteria of the PCPs in West Africa?</li> <li>Which values should guide the PCPs' practices in West Africa?</li> <li>Which principles should West African PCPs follow?</li> </ul> | <ul style="list-style-type: none"> <li>Group discussions facilitated by research team members</li> </ul>                                                                                                                                                                                         |
| <p>Roles, activities, governance, and professional identity of the PCPs in West Africa</p>       | <p>Questions series 1:</p> <ul style="list-style-type: none"> <li>What should be the composition of a primary care team at first-line health facilities?</li> </ul>                                                                                                                                                                                                                                                                                                                                                                                   | <p>World café, with three tables dealing each with a questions series. Three groups of participants were formed, and each group was assigned to a table to</p>                                                                                                                                   |

|  |                                                                                                                                                                                                                                                                                                                                                                                                                                                                                                                                                                                                                                                                                                                                                                                                                                                                                                              |                                                                                                                                                                                                                                                                                                                                                 |
|--|--------------------------------------------------------------------------------------------------------------------------------------------------------------------------------------------------------------------------------------------------------------------------------------------------------------------------------------------------------------------------------------------------------------------------------------------------------------------------------------------------------------------------------------------------------------------------------------------------------------------------------------------------------------------------------------------------------------------------------------------------------------------------------------------------------------------------------------------------------------------------------------------------------------|-------------------------------------------------------------------------------------------------------------------------------------------------------------------------------------------------------------------------------------------------------------------------------------------------------------------------------------------------|
|  | <ul style="list-style-type: none"> <li>• Which services should a first-line facility with PCPs offer?</li> <li>• What are the roles of a PCP within a primary care team?</li> <li>• What are the roles of the other members of the primary care team?</li> </ul> <p>Questions series 2:</p> <ul style="list-style-type: none"> <li>• Does a physician need postgraduate training to work as a PCP?</li> <li>• How do we manage the careers of PCPs to retain them in the primary care system?</li> <li>• How do we ensure good accountability of PCPs toward the community and other key stakeholders?</li> </ul> <p>Questions series 3:</p> <ul style="list-style-type: none"> <li>• How do we ensure good regulation of the PCPs' practices in West Africa to achieve the expected outcomes?</li> <li>• What are the minimum resources required for helping PCPs achieve the expected outcomes?</li> </ul> | <p>reflect on the corresponding questions.</p> <p>After 20 minutes, the groups changed tables and worked on the subject of the new table. After two rotations, each group could discuss all the questions. A facilitator and a rapporteur were assigned to each table. The rapporteur took note and presented a summary during the plenary.</p> |
|--|--------------------------------------------------------------------------------------------------------------------------------------------------------------------------------------------------------------------------------------------------------------------------------------------------------------------------------------------------------------------------------------------------------------------------------------------------------------------------------------------------------------------------------------------------------------------------------------------------------------------------------------------------------------------------------------------------------------------------------------------------------------------------------------------------------------------------------------------------------------------------------------------------------------|-------------------------------------------------------------------------------------------------------------------------------------------------------------------------------------------------------------------------------------------------------------------------------------------------------------------------------------------------|

199 .

200 [Ethical considerations](#)

201 We obtained ethical approvals for all original research, which results were used for the cocreation

202 process. Specifically, the cocreation workshop was conducted under the ethical approval N°

203 0513/CLERB-UP/P/SP/R/SA issued by the local ethics committee for biomedical research of the

204 University of Parakou and the ethical approval N° 1545/21 issued by the Institutional Review Board  
205 of the Institute of Tropical Medicine of Antwerp. We obtained a written informed consent from the  
206 participants to the empirical studies. Participants in the workshop all freely contributed to  
207 elaborating the policy framework and signed an attendance list. We managed all the data with strict  
208 confidentiality. We avoided putting the names of the participants (other than the research team  
209 members and the officials who provided public remarks) in all shared documents.

210

## 211 **Results**

### 212 [Overview of the framework](#)

213 The overall organisation of the policy framework is modelled on the classic organisation of several  
214 health systems frameworks. Indeed, the starting point of the policy framework is the framework  
215 produced from the scoping review which is inspired by:

- 216 - the Donabedian model [34] which provided the general architecture (structure, process,  
217 results)
- 218 - various health systems analysis frameworks, including the WHO building blocks of the health  
219 system [35] and the health systems dynamics framework of Van Olmen et al. [36]: since PCPs  
220 operate within a system, these frameworks guided us for a comprehensive and systematic  
221 identification of the items that could influence the performance of PCPs.

222 This initial framework was iteratively refined and enriched throughout the cocreation process. The  
223 resulting policy framework (Figure 2) includes the following overarching dimensions: first, the  
224 objectives assigned to the PCPs in Benin; second, the roles and activities of the PCPs; third, the  
225 professional identity of the PCPs in Benin; and fourth, the governance elements of the PCPs'  
226 practices. We described each dimension and subdimension of the policy framework in the following  
227 sections. We enrich these descriptions with verbatims/quotes illustrating the meaning participants  
228 give to some dimensions. The comprehensive viewpoints of the workshop participants are  
229 documented in the workshop report (S1 file).

## 230 Fig 2. Overview of the policy framework

231

### 232 Objectives assigned to the PCPs in Benin

#### 233 *Main objectives*

234 Workshop participants agreed that the overall goal of the PCPs' practices in Benin is " to improve  
235 people's health, well-being, and socio-economic conditions, including reducing morbidity and  
236 mortality". However, achieving this goal depends on more than just the PCPs' practices. Therefore,  
237 stakeholders retained four specific objectives for the PCPs' practices in Benin.

238 The first is to ensure the quality of care offered at the primary care level (first-line and community).

239 The following dimensions of quality of care were agreed upon:

- 240 - Patient-centeredness: Most participants in the studies and cocreation workshop stated that  
241 the care provided by the PCPs should meet the patients' and the community's needs and  
242 preferences. They have particularly insisted on a good welcome of the patients and good  
243 listening, enabling patients to express themselves and PCPs to understand the patient's  
244 concerns and build a trusting relationship with them. Furthermore, stakeholders stressed  
245 the need to consider the psychological aspects when dealing with a patient.
- 246 - Effectiveness means that the PCPs are able to make the correct diagnosis and that the care  
247 provided follows sound standards. Stakeholders also insisted on the fact that effective care  
248 should provide relief to patients regarding their health issues;
- 249 - Safety, meaning that the care provided should not harm the people receiving it;
- 250 - Integration, meaning that the PCPs and their team are able to provide the necessary services  
251 to the patients and community in a coordinated way, including health promotion, preventive  
252 and curative services.
- 253 - Continuity, including a long-term follow-up of the patient beyond one-time consultations.

254 The quotes below exemplify the participants' perception of this first objective.

255 *"The doctor needs to take into account the patient's psychology, so that the patient feels*  
256 *relieved.... Even if they [the doctors] have their own moods, they should leave all that behind*  
257 *when they are in front of the patients to welcome us, put us at ease and then, automatically,*  
258 *we are half cured"* (community member, FGD, Southern Benin, 2022).

259 *"The doctor needs to be a good listener, ask more in-depth questions to make a good*  
260 *diagnosis, and take concrete actions to resolve the problem of the diagnosis they have made.*  
261 *Then, thank the patient, give them an appointment so that they can come back, and I think*  
262 *that if they do that, hey, 95% of customers will say that this doctor is good"* (primary care  
263 worker, FGD, Northern Benin, 2022).

264 The second objective is to ensure the accessibility of healthcare to the population served. This  
265 includes:

- 266 - Geographical accessibility, which can require community outreach activities;
- 267 - Cultural acceptability, whereby the PCPs and their team try to adapt to the culture of the  
268 population served and avoid inappropriate attitudes and practices;
- 269 - Financial accessibility: the population complained about the high cost of PCPs' services, and  
270 the workshop participants recommended that the PCPs strive for financial accessibility  
271 through cost control or seeking financial protection solutions with community members;
- 272 - Availability of the PCPs and their team when the community needs them;
- 273 - Timely access;
- 274 - Equitable access, meaning that all people should have access to the care provided by the  
275 PCPs and their team, especially those who need it most.

276 The third objective is to ensure a sound referral system for the patients. This entails:

- 277 - A timely and safe referral of the patients who need it to the hospital,
- 278 - Good communication and coordination with other levels of care (community, various  
279 hospitals) and providers outside the primary care team (specialists, psychologists, social  
280 workers, etc.) in the local health system.

281

282 *"We have to ensure that they (the patients) are referred when the technical conditions here do*  
283 *not allow to take care of them, that they are referred on time, and that the mortality rate is*  
284 *almost zero." (PCP, in-depth interview, Northern Benin, 2022).*

285 The fourth objective is to ensure the satisfaction of patients and the community. Based on the  
286 stakeholders' statements, this satisfaction means that:

- 287 - The services provided by the PCPs should solve the problem that brought the patients to  
288 them.  
289 - The patients and the community should be at ease with their healthcare providers.

290 *"In terms of the doctor's performance, the patient's satisfaction comes first. And when the*  
291 *patient is satisfied, and you give them an appointment, they will come back. It may be chronic*  
292 *illnesses that require follow-up; you will always see them, and they will come. This facilitates*  
293 *collaboration, and at the same time, the health centre is better attended (local health authority,*  
294 *in-depth interview, Northern Benin, 2022).*

295

### 296 **Intermediary objectives**

297 Three intermediary objectives were also retained.

298 The first of these intermediary objectives is to contribute to the availability and sound performance  
299 of the primary care team. For this objective, PCPs are expected to ensure that the primary care team  
300 members are effectively present when the patients need them (thus no absenteeism) and have  
301 proper behaviour. PCPs are also expected to ensure that the primary care team members (including  
302 themselves) get continuous medical education and are able to provide good quality care effectively.  
303 To achieve this objective, the PCPs can also advocate with authorities and other key stakeholders to  
304 acquire an adequate primary care team and the necessary resources to strengthen this team's  
305 capacities.

306 The second intermediary objective is to support the management of health facility resources. This  
307 includes supporting the mobilisation and management of financial resources, the availability of  
308 adequate infrastructure and equipment, effective medicine supplies and sound hygiene in the  
309 facility. However, there is no full consensus on this particular objective. While local health  
310 authorities and PCPs from the public sector support it, other stakeholders, especially non-physicians  
311 and the PCPs operating on a private basis, emphasised that time invested in management tasks may  
312 go at the expense of patient care. Moreover, the performance analysis results indicate that  
313 delegation of the facility management to a professional supports PCPs' performance and secures  
314 time for patient care.

315 The quotes below illustrate both the first and the second intermediary objectives.

316 *"Apart from quality, people need to be able to see whether their presence is organising the*  
317 *work or the service... Are the staff acting correctly? Because if they are there and there is a*  
318 *mess, that means they are not doing their job. If they (the doctor) are there, the organisation*  
319 *must be good, we must have staff who are better than the others. And at the same time, if*  
320 *the number of patients increases, does the revenue increase? If they are there and the*  
321 *patients increase, and on the other hand they don't make sure that the revenue is well*  
322 *managed, that's another problem. So, in most of these centres where there is a doctor, illicit*  
323 *sales (of medicines) have practically stopped". (local health authority, in-depth interview,*  
324 *Northern Benin, 2022).*

325  
326 *"Because if she (the doctor) doesn't work well, will we go to the center again and see that*  
327 *everything is clear? It's like you have your own room, and every morning when you wake up,*  
328 *you don't sweep it; everything will be a mess. But when everything is clean and well*  
329 *organised, you know that the person in charge is doing their job properly. (community*  
330 *member, FGD, Northern Benin, 2022).*



331 The third intermediary objective is to contribute to building a health information system supporting  
332 patient care and decision-making. PCPs are thus meant to properly collect, analyse, and use the  
333 necessary data for decision-making and improvement. They are also expected to encourage other  
334 primary care team members to collect, analyse and use the data where appropriate.

335

## 336 Roles and activities

### 337 *PCPs' roles and related activities*

338 Six roles were defined for Beninese PCPs: care provider, guarantor of the quality of care, interface  
339 between population and other actors within the health system, planner and coordinator of health  
340 activities targeting a given population, health educator and community advocate, and leader of the  
341 care team.

342 As a **care provider**, the PCP's key activities include the provision of medical consultations to the  
343 patients. However, almost all stakeholders agreed that, because of their limited number, the PCPs in  
344 Benin may focus on complex cases (especially non-communicable diseases) and emergencies. As a  
345 result of the latter, many stakeholders suggested extending the package of services provided by a  
346 first-line health facility with a PCP. However, others were wary of such an extension because it may  
347 lead to higher costs and overlaps with the hospital activities. It was agreed that further reflections  
348 are needed to decide which services should be added when a PCP is in a first-line health facility.  
349 Stakeholders also strongly recommended that PCPs integrate prevention and health promotion into  
350 the care they provide.

351 The **guarantor of quality of care role** is one of the roles in which the stakeholders find the most  
352 added value in the PCPs, compared with the other primary care workers. Therefore, PCPs are  
353 expected to oversee and enhance the quality of the care provided to the patients and community.  
354 They may thus train and supervise other primary care team members. They should also lead or  
355 participate in relevant quality assessment and quality improvement activities, for instance, clinical  
356 audits, regular discussions with their team about the patients they received, etc.

357 As **the interface between populations and other actors**, the PCP is responsible for screening the  
358 population and referring them to other professionals as early as possible when needed. They are the  
359 anchor point of the patient in the health system. They organise the referral of the patients when  
360 needed, and they coordinate the actors and interventions needed by the patients and the  
361 community.

362 As **planner and coordinator of health activities for a given population**, the PCP is responsible for  
363 planning the health activities with the primary care team according to the needs and the national  
364 health policy. They are also responsible for coordinating the implementation of these activities. This  
365 role will require the PCPs to perform non-clinical activities such as budgeting, reporting, etc.

366 As **health educator and community advocate**, the PCP should actively seek good relationships with  
367 the community, including community leaders. This can be done through dialogues with community  
368 members. PCPs are also expected to provide relevant information to maintain the good health of  
369 community members through, for instance, sensitisation campaigns or other health communication  
370 approaches. The PCPs should also listen to the community, identify its needs and advocate for  
371 fulfilling them.

372 As **the leader of the care team**, the PCP takes responsibility for achieving the objectives assigned to  
373 the care team. This includes seeking resources and guiding other team members to achieve shared  
374 goals. While the PCPs are not the only ones who can be leaders in a primary care team, the empirical  
375 data showed that PCPs who were given a leadership mandate and the necessary autonomy to apply  
376 it enhanced the teams' performance. They succeed even more when they adopt a person-centred  
377 leadership style, valuing and respecting other team members and promoting shared objectives,  
378 values and collaboration within the team.

379 The following quotes highlight some of these roles.

380 *"I was saying that the role of a doctor is to see the patient from the very beginning of the*  
381 *illness, to ensure that the pathology doesn't develop into something serious, and that the*  
382 *patient is treated as soon as possible... The PCPs play a vanguard role in public health. At the*

383 *first line, when we see cases that seem epidemic to us, we raise the alarm and inform the*  
384 *authorities"* (PCP, in-depth interview, Northern Benin, 2022).

385  
386 *"They (the PCPs) have to mobilise their teams, dynamise them and make sure that they don't*  
387 *go off the rails... They have to encourage work well done, while giving greater responsibility*  
388 *to the players in the health system."* (local health authority, in-depth interview, Northern  
389 Benin, 2022)

390  
391 *"If there is a new disease coming, for example, she can raise awareness among the*  
392 *population so that they change their behavior to avoid it... You know that the doctor is there*  
393 *to coordinate, so when something like this happens, she informs her team and sends her*  
394 *team out into the field to raise awareness."* (Community member, in-depth interview,  
395 Northern Benin, 2022)

396

### 397 **Organisation of primary care services**

398 Three themes emerged related to the organisation of primary care services.

399 The first one is that PCPs in Benin should not work alone or in silos. They should instead work in  
400 teams with other primary care team members. This teamwork implies task-sharing, cooperation and  
401 mutual learning. Through task-sharing, each cadre of the primary care team would take on the tasks  
402 where they could have added value. According to the data gathered, the added values of the PCPs in  
403 Benin include:

- 404 - Complex diagnosis and procedures (such as care for chronic diseases and complications)
- 405 - Training and coaching health workers with less knowledge and skills
- 406 - Relationships and negotiations with community and health leaders and with specialist  
407 physicians.

408 As for non-physicians (especially nurses-practitioners), the stakeholders (both in the empirical  
409 studies and the workshop) see their added value for:

- 410 ○ Regular follow-ups of patients (they appear to be more available and less  
411 intimidating to the patients)
- 412 ○ Long-term relationships with patients
- 413 ○ Task related to their specific training (e.g. nursing, social support, etc.).

414 However, there can be flexibility in the organisation of the team, with, for instance, the possibility of  
415 non-physicians providing medical consultations for simple cases when needed and if they have the  
416 necessary skills. All team members should cooperate around the needs of the patients and learn  
417 from each other, as stated by a community member below:

418 *" The second thing I want to say, whether it is the assistant, the nurse or even the doctor,*  
419 *what we want to tell you and tell all the people of Benin is that they are all health workers,*  
420 *and it is not suitable for them to fight over a patient. It is important that there is a mutual*  
421 *understanding because the nurse has, let's say, their own brain, the assistant has theirs, and*  
422 *so does the doctor. So, it's important that when a patient comes in, and the illness is a bit*  
423 *serious, everyone consensually agrees on a diagnosis to decide what needs to be done to the*  
424 *patient to regain their health. (Community member, FGD, Northern Benin, 2022).*

425 The second theme related to the services organisation is community engagement. The PCPs and  
426 other primary care team members should seek partnerships with the community leaders and key  
427 stakeholders within the community. This can be achieved through regular communication,  
428 collaboration and participation in key community development activities.

429 Finally, an effective and up-to-date referral system should support the primary care team.

430 Stakeholders recommended the establishment of a mechanism or a platform for smooth referrals  
431 and enabling contact with specialists. This referral platform should include all needed services and  
432 providers (even beyond the health sector). The platform is physical (network of providers) and digital  
433 (online platform). There were also recommendations for innovation and improvement of the current

434 referral system (for instance, adapting the system to consider the spontaneous networks currently  
435 used by PCPs, the urban context, etc.).

436

### 437 **Professional identity**

438 In the policy framework, we defined professional identity as "the set of attributes, values, principles,  
439 motives, and experiences that PCPs and other stakeholders use to define PCPs in their professional  
440 work". This definition was adapted from the one of Caza et al. [37]. The policy framework includes  
441 three sub-dimensions of professional identity: the attributes of a PCP in Benin, the values and  
442 principles that should guide PCPs' practices, and recommendations for strengthening PCPs'  
443 professional identity.

444

### 445 **Definition of a PCP in Benin**

446 The PCPs' definition (see Figure 2) was adopted by the workshop's participants (S1 file) and validated  
447 during subsequent discussions with the stakeholders.

### 448 **Fig 3. Definition of a primary care physician in Benin**

449

### 450 **Values and principles**

451 The values highlighted in the framework are the following: respect for people, empathy, altruism,  
452 community orientation, humility, professionalism, and integrity.

453 Respect for people entails that PCPs should listen to their patients and their team members. They  
454 should also respect them and respect the patient's rights and cultural identity.

455 Through empathy, the PCPs will ensure that patients are well treated and get the best experience  
456 throughout their care pathway.

457 Altruism implies that the PCPs will pursue the well-being of the patients and community first instead  
458 of personal gains.

459 By embracing humility as a value, the PCPs are expected to be open-minded, adaptable, creative,  
460 and proactive. They should also show a spirit of teamwork and cooperation.  
461 Professionalism implies that the PCPs will seek competence and work with dedication and quality.  
462 They will also demonstrate leadership and display good communication skills.  
463 Community orientation demands that the PCPs assess and respond to the needs of the community  
464 served.  
465 With the integrity value, the PCPs will avoid malpractices (such as ransomware) and respect the best  
466 standards of care.  
467 According to the stakeholders that contributed to the creation of this policy framework, these values  
468 and principles should guide the PCPs' practices and the practices of the primary care team.

469 *"Respondent: The first thing is integrity; a doctor has to be honest, a doctor has to have*  
470 *integrity...*

471 *Interviewer: What do you mean by being honest?*

472 *Respondent: Honesty... Honesty and integrity... It is a value that requires human beings to do*  
473 *things as they should, without trying to round things up for their own well-being or personal*  
474 *needs. For me, a doctor must be honest and have integrity, so it's the same thing. He needs to*  
475 *give the best and fairest possible response to the patient. A doctor doesn't lie. A doctor doesn't*  
476 *juggle; a doctor doesn't fake things. Also, a doctor has to be empathetic; that is very important.*  
477 *He must learn to be compassionate about society's problems..." (PCP, in-depth interview,*  
478 *Northern Benin, 2022).*

479

#### 480 **Building the PCPs' professional identity**

481 The stakeholders strongly emphasised that developing and strengthening a specific professional  
482 identity of PCPs is essential. This includes the promotion, among the PCPs, other primary care team  
483 members and future primary care workers, of the values and principles stated above and explaining  
484 and promoting the performance objectives expected from the PCPs.

485 Another related recommendation is that policymakers and training institutions give PCPs official  
486 status. This includes developing postgraduate training, changes in salary, etc. This would facilitate  
487 their integration into national policies. It would also increase their motivation and retain them within  
488 the primary care practice.

489

#### 490 **Governance**

491 Governance is the function of a health system that ensures policy guidance, regulation and  
492 coordination of different functions and actors, optimal allocation of resources, and accountability  
493 towards the population and all stakeholders [13,36]. In this policy framework, the governance  
494 dimension includes ten actions that can support PCPs in their roles and activities and facilitate the  
495 achievement of the objectives assigned to them.

496

#### 497 **Designing and implementing adequate regulations and policies**

498 For this element, the policy framework recommends that the Ministry of Health, the medical council  
499 and other institutions responsible for developing the PCPs' practices clearly define the rules for  
500 PCPs' training, posting and career development, their roles, their salaries and other financial  
501 incentives, etc. This policy framework was cited as a key step for this element. Its recommendations  
502 could help to integrate PCPs' practices better in national health policies and health sector regulatory  
503 documents.

504

#### 505 **Ensuring an adequate preparation of PCPs**

506 The performance analysis of the PCPs' practices showed that good preparation of the PCPs prior to  
507 or at an early stage of their job appointment is critical. Such preparation will give the PCPs the  
508 necessary values, knowledge, attitudes, and skills for practising at the primary care level (and, if  
509 needed, in underserved areas). This preparation can be done through undergraduate training,  
510 postgraduate training or early field coaching.

511

512 **Providing relevant continuing education of PCPs in both public and private sectors**

513 The data largely highlighted the lack of a well-established and systematic continuing education  
514 system for the PCPs. This policy framework thus proposes the development of a training curriculum  
515 for the PCPs. Training topics suggested by the stakeholders include (but are not limited to)  
516 community health issues, health promotion, public health, care for the most frequent medical  
517 conditions and emergencies, care of complex health issues, leadership and management, values for  
518 the PCPs' practices, etc.

519 Another recommendation for this element is establishing a platform for training and scientific  
520 exchange among PCPs, other primary care workers, specialists, and other relevant stakeholders. This  
521 platform can also enable the PCPs to be in contact with peers and specialists.

522

523 **Establishment of a supportive supervision and coaching system**

524 Even though physicians are among the most highly trained cadres of health workers, the empirical  
525 data and the stakeholders' perceptions agreed on the necessity to support the PCPs in their daily  
526 work. This support can be provided to PCPs through coaching by experienced and trusted  
527 professionals, who will provide continuous guidance for improving performance and dealing with  
528 unknown or complex situations. PCPs can also benefit from supportive supervision, including on-the-  
529 job visits to monitor and provide feedback on their performance. Coaching and supportive  
530 supervision must also include psychological support to PCPs to cope with work-related stress (as  
531 data collected during the COVID-19 pandemic emphasised). Supportive supervision and coaching can  
532 be provided by senior officials within the health system, experienced PCPs, professional  
533 organisations, etc. The empirical data showed that peer support is also valuable and can be achieved  
534 through regular discussions, experience sharing, and community-building activities.

535

536 **Promoting and strengthening PCPs' organisations**



537 This element was deemed important because, if stronger than they currently are, the PCPs'  
538 organisations can support the PCPs, promote PCPs' values and facilitate good excellence among  
539 primary care physicians. This promotion of PCPs' organisations can start with the medical council  
540 and existing organisations such as the association of the "*médecins généralistes communautaires*".

541

#### 542 **Providing a multidisciplinary primary care team**

543 Having agreed that the PCPs in Benin should work within a team, the stakeholders recommended  
544 defining the minimum composition of a multidisciplinary primary care team depending on the  
545 context and the utilisation level of the health facility. Policymakers and key stakeholders should  
546 support primary care facilities to get the minimum care team. An ideal composition of a  
547 multidisciplinary primary care team in Benin was proposed during the workshop and this includes 1  
548 PCP, 1 midwife, 1 nurse-practitioner, 1 pharmacy clerk, 1 cashier, 1 laboratory technician, 1 social  
549 worker, 1 physiotherapist, 1 psychologist, 2 to 3 nurse-aids, 1 cleaning staff, 1 security guard, 1  
550 hygiene officer, 1 administrative and finance staff. However, the stakeholders recognised that having  
551 the ideal team will not be feasible in many settings, and some cadres may not be needed full-time.  
552 This is why they suggested promoting the mutualisation of some cadres (for instance, administrative  
553 and financing staff or psychologists) between facilities if feasible and needed.

554

#### 555 **Ensuring adequate equipment, infrastructure, and consumables**

556 The stakeholders also recommended defining the minimum equipment, infrastructures, and  
557 consumables needed, depending on the health facility's context and utilisation level. The presence  
558 of a PCP would increase the complexity of the cases treated and the interventions delivered by the  
559 primary care team. The equipment and infrastructure should thus be adapted accordingly. However,  
560 the stakeholders strongly recommended carefully assessing the added value of any new equipment  
561 so as not to increase costs unnecessarily.

562 Once the minimum equipment, infrastructures, and consumables are defined, the PCPs and their  
563 teams should be supported to get them.

564

#### 565 **Design and enforcement of sound accountability mechanisms**

566 Setting up sound accountability mechanisms was highlighted in both the empirical data and the  
567 workshop as an important element for enhancing PCPs' performance. Relevant accountability  
568 mechanisms for the PCPs in Benin include:

- 569 - Clearly defining and sharing the roles and responsibilities of the PCPs (and primary care team  
570 members), the expected performance objectives, and how they will be assessed. The current  
571 policy framework can provide a basis.
- 572 - Defining and regulating the geographic area or the population to be covered by the PCPs'  
573 practices to guarantee good coverage across the entire Benin population.
- 574 - Ensuring the PCPs have the necessary capacities, resources, and autonomy to fulfil their role  
575 and achieve the objectives.
- 576 - Ensuring a regular assessment of PCPs and related incentives and sanctions
- 577 - Ensuring the participation of PCPs in the monitoring of the local health systems' indicators  
578 and various health systems activities in both public and public sectors (for feedback and  
579 learning)
- 580 - Establishing accountability platforms where PCPs can share their experiences and report to  
581 the population (e.g. Local Development Associations, Health Centre Management  
582 Committees, etc.).

583

#### 584 **Careful design of adequate financing modalities of PCP practices**

585 The financing modalities of the PCPs should ensure a decent salary and the financial sustainability of  
586 their practices. This is especially vital in the private sector as the empirical data shows that a lack of  
587 financial support may lead the PCPs and their facilities to increase costs or over-prescribe health

588 services. Financial support to the PCPs can include facilitating access to loans to establish a practice,  
589 carefully chosen financial incentives or even indirect financial support such as health insurance,  
590 financial guidance, or access to professional financial management for the health facility. Finally, the  
591 financing modalities of the PCPs can support their accountability if geared towards the results  
592 expected from the PCPs and integrated with other accountability arrangements.

593

#### 594 **Building a health information system that is supportive to PCPs' performance**

595 The stakeholders strongly suggested providing a well-performing health information system to  
596 support the PCPs' practices. Indeed, they argued that the PCPs and their team will need a sound  
597 health information system to ensure the continuity of care, good referrals and learning about their  
598 practices. The stakeholders particularly insisted on a better digitalisation of the health information  
599 system, especially patient files, through, for instance, patient data recording or accounting  
600 management software. They have also insisted on involving the PCPs and other primary care team  
601 members in re-designing these tools and the health information system.

602

#### 603 **Context**

604 In this policy framework, the context relates to any element outside the boundaries of a given PCP's  
605 practice. It includes members of other practices, other health workers and services, other parts of  
606 the local health system, other sectors (e.g. the social welfare sector), community members, general  
607 national policies, the socio-economic and political context, etc.

608 While this policy framework can serve as general guidance for the PCPs' practices in Benin, its  
609 recommendations or strategies should be adapted to the various contexts. Stakeholders especially  
610 recommended carefully assessing the particular needs of rural areas and other underserved areas  
611 (e.g. urban slums). Also, the planning for PCPs' practices should consider the growing urbanisation in  
612 Benin and anticipate emerging needs and challenges. Policymakers should consider specific  
613 arrangements for the private sector whenever needed. For instance, PCPs from the private sector

614 may need specific financing modalities such as tax reduction, loans, contracts for providing essential  
615 health services, etc.

616 Furthermore, individual PCPs may not be required to embrace all the roles defined in the policy  
617 framework (although they should be prepared for them). For example, the various roles can be  
618 embraced by a team instead of an individual PCP if there is more than one PCP or other primary care  
619 team members better suited for some roles. This is particularly important in Benin, where PCPs work  
620 alongside nurse practitioners who are sometimes very experienced and competent in various areas.  
621 Similarly, the activities and the organisation of a PCP's practice can change with the context, as  
622 illustrated below:

623 *"Now, it also depends on where the doctor is, where they are playing their role as the first*  
624 *line of care. If they are in a remote area where there are no specialists, they become*  
625 *everything, until they can send the patients to where there are specialists, you see? Don't ask*  
626 *a doctor at the first line in Tchoumi-Tchoumi (a remote area in Benin) who sees a patient*  
627 *with high blood pressure to send them to a cardiologist. They need to give the patient some*  
628 *sort of treatment to help them. When the doctor is sure that the patient can go and see a*  
629 *specialist, they will tell them to go to this or that place so that they can see a specialist...".*

630 (Local health authority, in-depth interview, Northern Benin, 2022).

631

## 632 **Discussion**

### 633 [Comparison with international literature and PCPs' practices in the world](#)

634 Most of the items included in this policy framework are consistent with the specificities of generalist  
635 PCPs' practices described around the world and key recommendations for strong PHC systems.  
636 However, the Benin PCPs policy framework features several particularities which reflect the  
637 country's context, history, and needs.

638 ***Objectives assigned to the PCPs in Benin, compared to other settings***

639 The objectives of ensuring quality of care and ensuring a sound referral system and coordination  
640 encompass several core competencies expected from the General Practitioner / Family Doctor as  
641 outlined by WONCA Europe, including person-centred care, specific problem-solving skills,  
642 comprehensive approach, care coordination, etc. [38].  
643 Quality of care and access to services are the two immediate outputs expected from the service  
644 delivery within the PHC measurement framework issued by WHO and UNICEF in 2022 [16]. However,  
645 though access is usually cited as a key feature of a good PHC system, it is not always clear that the  
646 PCPs have a specific responsibility in ensuring this access. The assignment of this objective to the  
647 Beninese PCPs aims to draw their attention to the fact that, beyond the clinical aspects, they also  
648 have a societal responsibility to contribute to access to care and the community's well-being. For  
649 instance, the PCPs can adopt, and promote among their team, behaviours that will help reduce the  
650 costs of care for the patients, such as rational prescription of drugs and lab tests, promoting quality  
651 [39].

652 Regarding the objective to ensure patient and community satisfaction, it strongly reflects a subject  
653 currently high on the agenda in Benin [32,40] and the international community [11,41]: improving  
654 patient welcome and respectful care. However, this objective could be further discussed in Benin to  
655 reflect a more active role for patients and communities. For instance, the WONCA talked of  
656 "promoting patient empowerment" [38], and empowering individuals and communities was one of  
657 the commitments of the Astana declaration on PHC in 2018 [16].

658

659 ***Beninese PCPs' roles and services organisation versus other countries***

660 Many of the roles proposed for the PCPs in the Benin health system are similar to those described in  
661 other African countries [13,42–44] and even beyond [38,45].  
662 The care provider role is obviously found in every description of PCPs' roles [13,38,44–46]. However,  
663 because the number of PCPs in Benin is still limited, stakeholders recommended that PCPs primarily

664 concentrate on the most complex cases or healthcare activities. This is consistent with the views  
665 reported elsewhere on family physicians' role in Africa [11,47], and it entails allowing competent  
666 non-physicians to contribute to patient management. This recommendation is also supported by  
667 empirical work in Benin, which showed that patients spontaneously chose nurses for simple cases  
668 [32]. Furthermore, international literature indicates that task sharing between physicians and nurses  
669 increases accessibility [5,39,48] and that experienced nurse practitioners can adequately care for  
670 many primary care encounters [49]. However, this recommendation conflicts with the common  
671 practice among private PCPs in Benin and the vision of the "médecins généralistes communautaires"  
672 [50], which are all geared toward the provision of first-contact care by the PCPs. Moreover, previous  
673 experiences with public PCPs in Benin indicated that task-sharing often led many to focus on hospital  
674 or administrative work. Therefore, it will be important to find a careful balance between being fully  
675 dedicated to first-contact care and only consulting complex cases. Each primary care team can  
676 determine the optimal balance based on physician availability, workload, and team members'  
677 expertise while prioritising the community's access to the best possible quality of care from their  
678 first entry into the health system.

679 The Benin PCPs' role as guarantors of quality of care is another role widely reported around the  
680 world, especially in recent years. Indeed, it is increasingly recognised that PCPs should not only  
681 provide individual care but also contribute to the continuous improvement of the quality of the care  
682 provided to the community for which they take responsibility [38,43,45,46]. This includes a  
683 continuous assessment of the care, followed by corrective actions if necessary [38]. Within this role,  
684 the recommendation for the PCPs to train and supervise other primary care team members was  
685 most described in the African literature [42–44]. This is not surprising given the recommendations  
686 for task sharing with non-physicians and the leadership role assigned to the PCPs.

687 The role of "interface between populations and other actors" is also described in the literature  
688 [38,44,45,51], usually referred to as "coordination" or "synthesis" role. Indeed, the descriptions  
689 provided by the stakeholders for this interface role align with WONCA's recommendations for the

690 synthesis role. This role involves ensuring that patients access the healthcare professionals and  
691 technologies needed for their problems appropriately. It also includes protecting the population  
692 against unnecessary (usually costly and sometimes harmful) tests, screenings, or treatments,  
693 ensuring a good distribution of information, and guiding patients through the health system's  
694 complexity [38].

695 The leadership role of the PCPs is more and more described for PCPs in Africa [42–44,52] and other  
696 settings such as Canada [46]. This leadership role goes beyond the clinical setting. It includes a  
697 person-centered leadership able to motivate, collaborate with, and organise all primary care team  
698 members around common objectives and values [44,46,52]. As leaders, PCPs are also expected to  
699 help the primary care team access the necessary resources to achieve these objectives. This task  
700 both supports and requires many other aspects of the policy framework, including community  
701 engagement, the PCPs' role as planners, coordinators and guarantors of quality, etc. Furthermore,  
702 while other primary care team members can assume leadership roles [52,53], the performance  
703 analysis of PCPs in Benin indicated that granting them leadership responsibilities to PCPs, coupled  
704 with the autonomy to exercise them, significantly enhances their performance [32].

705 The planner and coordinator role seems more controversial. Indeed, with this role, the PCPs in Benin  
706 are requested to perform various activities, ranging from organising the work within the health  
707 facilities to running health campaigns to conducting purely administrative work. This planning and  
708 managerial aspect is explicitly outlined in the job description of public PCPs within a Beninese health  
709 region [54]. Similarly, family physicians in various countries [42,43] and "Médecins Généralistes  
710 Communautaires" [44] are expected to effectively manage their team and their practices, support  
711 their facility with management tasks, and/or organise outreach activities and other public health  
712 activities. However, several voices warn against the PCPs' managerial tasks overwhelming their  
713 clinical responsibilities [47]. The Government of Benin also issued an official letter in 2022 requesting  
714 the public PCPs to reduce their managerial tasks and dedicate all mornings to patient care.  
715 Therefore, PCPs and healthcare leaders should ensure that administrative tasks stay within

716 reasonable limits. The PCPs' performance analysis in Benin showed that hiring a professional  
717 manager (other than the clinical staff) can greatly enhance the PCPs' performance and improve  
718 resource management [32]. When such a manager is available, the planner role of PCPs can,  
719 therefore, be assigned to this manager, or at least the administrative part of this role.

720 Regarding the organisation of primary care services, stakeholders, including patients and community  
721 members, strongly advocate for teamwork within the primary care team in Benin. This aligns with  
722 current evidence demonstrating the benefits of teamwork, including better quality of care [16,55],  
723 better coordination [38], better access [56], and cost-effectiveness [48]. Teamwork goes beyond  
724 simply working together and task-shifting to those considered subordinates [52]. It involves a  
725 genuine collaboration where each team member brings an added value. Unfortunately, in many  
726 cases, such teamwork is inexistent in Benin [32]. The Benin PCPs policy framework's  
727 recommendation of teamwork will thus improve PCPs' performance and ensure patients benefit  
728 from a diverse range of complementary skills among PCPs and their team members.

729 Community engagement, another service organisation aspect of the policy framework, is an  
730 important attribute described for family medicine and primary care practice in Africa [55,57] and  
731 elsewhere [38,45,56]. In Cuba, basic health teams (typically comprising a family doctor, a nurse, and  
732 a public health specialist) succeeded in lowering the incidence and prognosis of conditions like  
733 hypertension through regular home visits and health education [45]. The number of PCPs in Benin  
734 may not (yet) allow all of them to make regular home visits or be permanently present in the  
735 community as in Cuba. The community health policy implemented in Benin [58] is thus an excellent  
736 opportunity for PCPs as they can work with community health workers to provide the necessary  
737 services to their community. However, this should not be an excuse for PCPs to remain in an ivory  
738 tower, as is sometimes the case. They need to immerse themselves in their community, understand  
739 its social realities, establish regular communication with community leaders, and find mechanisms to  
740 remain accessible when needed.



741 The last aspect of service organisation highlighted by the policy framework is establishing an  
742 effective referral system. This referral system would allow a smooth flow of patients across various  
743 providers and levels of the health system as needed. A key suggestion is to build referral networks  
744 within the primary care level, especially for medical specialists or other cadres (specialised nurses,  
745 physiotherapists, social workers, nutritionists, etc.) for whom small facilities cannot provide enough  
746 patients to justify their full-time presence. This is already happening in the private sector in Benin,  
747 but it is not structured. The polyclinic model in Cuba provides an example of such referrals among  
748 primary care facilities [45,59]. These polyclinics are staffed with physicians from various specialities  
749 and other health and non-health specialists, offering an average of twenty services, including  
750 preventive care, routine curative care, emergency services, rehabilitation, lab tests, etc. [59]. They  
751 also serve as an organisational hub for a number of basic health teams, supporting information  
752 sharing, coordination of activities, accountability and learning among them [45,51]. The polyclinics  
753 were considered key contributors to good results obtained by the Cuban primary health care system  
754 [45,51,59]. Also, the rise of polyclinics helped decrease the number of hospitals needed, thus  
755 achieving greater efficiency [45,59]. Another example of such primary care hubs is in Brazil with the  
756 Family Health Support Centers, which are composed of various specialist physicians, health and  
757 social workers, alternative medicine professionals, etc.[56]. However, care must be taken to ensure  
758 that opting for polyclinics or similar referral networks does not result in over-medicalising relatively  
759 benign health issues and the excessive use of specialised technologies at the primary care level.  
760 Another recommendation concerning the referral system involves thinking beyond the classical  
761 primary care centre to district hospital referrals. This entails integrating into the referral networks,  
762 after careful analysis, secondary care facilities (for instance, non-profit hospitals or even some  
763 private polyclinics) the PCPs already trust and use spontaneously. Indeed, empirical data from a  
764 study of 155 PCPs in Benin revealed that 42.6% of them refer emergencies to facilities other than the  
765 district hospital, which should formally be the first option. Sometimes, the PCPs' choice is due to the

766 district hospital's distance from their facilities. However, in many cases, their choice is driven by a  
767 higher level of trust in these other facilities to provide the necessary care for their patients [18].  
768 Whatever referral system is chosen, PCPs and their teams will need direct communication lines,  
769 regular contacts for learning and sharing and good coordination with various providers within the  
770 referral network. This communication is often lacking in Benin [10], and some good practices can  
771 inspire the country. For instance, online platforms can collect and share patient data among relevant  
772 providers and provide guidelines and other useful resources to health providers for one-on-one  
773 discussions between providers and continuous group discussions [48,60]. Regular learning sessions  
774 among providers within the same referral network can also be useful [45,61].  
775 The policy framework proposed in this paper did not provide details on aspects such as opening  
776 hours, patient flow management, payment modalities for services by the patients, and other  
777 measures aimed at facilitating the primary care team's work and enhancing the accessibility of PCPs'  
778 practices. It is because such aspects are very specific and should be adapted to the local priorities,  
779 the resources available, and the particularities of the community served.

780

### 781 ***Governance of the PCPs' practices***

782 While the literature often describes the weak governance of the health workforce in sub-Saharan  
783 Africa [11,13,62], the descriptions or normative frameworks we found on the PCPs focus on their  
784 roles, competencies, values and attributes [38,44,46,63]. Most of the ten governance interventions  
785 proposed by the Benin PCPs policy framework are also recommended in various frameworks related  
786 to PHC [16] or PHC workforce, including the recent policy document on building PHC teams for UHC  
787 in Africa developed by the African Forum for PHC [53]. However, the Beninese framework  
788 highlighted elements specific to both the PCPs and the context of Benin.  
789 Developing and adopting adequate regulations and policies is a key intervention, and countries  
790 should adopt them for both the public and private PCP [53,64]. This intervention is even more  
791 important in Benin, given its huge private sector, where over 90% of PCPs work [18]. Strong

792 regulation can provide PCPs with clear role definitions, adequate resources, and equitable  
793 distribution (presently, 90% of PCPs are concentrated in urban areas [18]). Furthermore, adequate  
794 regulations can effectively align the PCPs' work with the national health policy. For instance, posting  
795 rules and incentives in Brazil helped improve physicians' distribution between urban and rural areas  
796 [56].

797 Adequate preparation of the PCPs is the most cited intervention in the literature. This includes  
798 undergraduate and postgraduate training adapted to the local context [45,55,56] and providing the  
799 PCPs with adequate skills and exposure to general and community practice [42,44,55]. In Benin, this  
800 preparation proved crucial as it greatly influences the PCPs' performance [32] but is often lacking  
801 [18].

802 Providing adequate continuing education [63,64] and establishing a supportive supervision and  
803 coaching system [5,32,53] have proven to be pivotal interventions for strengthening the practices of  
804 primary care workers, including PCPs. Strangely, there seems to be a prevailing perception that PCPs  
805 do not require such interventions, which could explain the current deficiency observed in the  
806 continuous education, supervision, and coaching of PCPs in Benin [10,32]. Yet, PCPs, too, require  
807 continuous education in both the public and private sectors [64].

808 Professional organisations can play a significant role in offering this support and coaching for PCPs  
809 [5,50], especially because they can reach PCPs from both the private and the public sectors [64].  
810 They can also contribute to regulating their practices and promoting appropriate values. In Benin,  
811 most PCPs are affiliated with the National Council of Physicians [18]. However, the functioning of this  
812 council needs to be improved. Other professional organisations to which the PCPs are affiliated  
813 include the National Association of "Médecins Généralistes Communautaires", physicians' syndicates  
814 and private facilities associations for those who own private practices. Unfortunately, only 40% of  
815 PCPs are affiliated with any of these organisations (apart from the council) [18]. Enhancing the  
816 functioning of these organisations, as suggested by the policy framework, will be essential.

817 While the literature widely recommends to ensure an appropriate primary care team and adequate  
818 equipment, infrastructure, and supplies to support the PCPs' practices in sub-Saharan Africa  
819 [5,45,53], the PCPs performance analysis in Benin [32], along with examples from other countries  
820 [45,65] demonstrates that considerable achievements can be made even with limited resources. This  
821 is especially possible with robust political support [45], effective team leadership [32,45] and strong  
822 partnerships with community members [32,64]. However, this should not prevent from investing to  
823 support the work of the primary care teams in Benin.

824 Financial support is indeed a key recommendation of the policy framework. Studies indicate that  
825 practices strongly dependent on self-funding and patient fees often face sustainability challenges  
826 [48,66], posing risks to accessibility [32,48], equity [18,48], and even quality of care [32]. These  
827 issues are more frequently found in the private sector. Various approaches can help provide financial  
828 support to private providers, including tax benefits [64], contracting private providers for some  
829 aspects of service delivery [48,64], or financial support for initial practice start-ups [50]. Moreover,  
830 non-financial support and advice can be provided to PCPs and their teams, aiming to reduce  
831 healthcare production costs without compromising quality. This can be, for instance, social  
832 franchising for sharing administrative costs and getting more credibility [48], giving the PCPs access  
833 to a professional facility manager [32], supporting them in establishing their business plan [50],  
834 promoting the use of generic drugs [45,48], using diagnostic support software [39,48,64], etc. Benin  
835 is building its national health insurance scheme and considering contracting with private providers.  
836 This presents an opportunity for private PCPs as these contracts could bolster their financial  
837 sustainability. In return, it can assist the government in regulating their practices effectively and  
838 better aligning them with national health objectives.

839 Health workers' accountability is increasingly mentioned in papers on health workforce development  
840 and quality of care. Several frameworks, for instance, the CanMEDS 2015 physician competency  
841 framework [46] or the Statement of Consensus on Family Medicine in Africa [63], clearly establish  
842 the social accountability of the PCPs. However, few documents explicitly state how to achieve this

843 accountability. Usually, only some aspects of accountability are explicated, mostly the clear  
844 definition of roles and responsibilities [53] and a clear definition of the population of responsibility  
845 [53,57,64]. Similarly, in Benin, only some aspects of accountability are currently implemented. There  
846 is a job description for the PCPs working in the public sector in Benin, and the population for whom  
847 they are responsible is relatively well-defined, determined by the geographic area assigned to their  
848 health facility [54]. However, job descriptions are not consistently present in the private sector, and  
849 there is almost no formal definition of the population for which private PCPs are responsible.  
850 Consequently, they barely feel responsible for monitoring the health status of a given population or  
851 addressing the needs of a specific community. Additionally, when public and private facilities share  
852 the same geographic area (especially in urban settings), attributing responsibilities can be  
853 challenging when a problem arises. Private PCPs in Benin seldom participate in monitoring local  
854 health system indicators. As for regular assessments of PCP practices and accountability platforms to  
855 report to the populations, they are insufficiently implemented in both the public and private sectors  
856 in Benin. The Benin PCPs policy framework provides recommendations that can help holistically  
857 address accountability issues.

858 The benefits of an effective health information system to support the PCPs' performance are largely  
859 shown. For instance, in Cuba, family doctors and their teams are required to gather and analyse data  
860 on their assigned community and present the results at local meetings with community groups  
861 [45,51]. In Belgium, the Intego database [67] relies on electronic health records to routinely compile  
862 a large amount of data on the PCPs' practices. This data helps to understand and detect changes in  
863 the epidemiological profile of the population. The data also helps analyse the PCPs' practices (drug  
864 prescription, for example) [67]. In Benin, the health information system mainly collects data (usually  
865 aggregated for each facility) on key health indicators, which is helpful in following the progress on  
866 these indicators at the national and sub-national levels. However, the health information system  
867 should provide detailed information on individual patients and care processes for a regular analysis  
868 of the care practices and changes in the population's needs. Moreover, the patient files in Benin are

869 still largely paper-based [18], with risks of data loss or errors during reporting. It also requires a lot of  
870 extraction work and resources if one wants to assess the care process for quality improvement or  
871 research purposes. Digitalising the health information system at the facility level, with  
872 interconnection to national databases, can help gather detailed health information and support data  
873 analysis [48,67]. It is feasible in Benin despite the still limited electricity and computer access.  
874 Indeed, offline solutions exist and can be adapted for use on smartphones, and the mobile internet  
875 penetration in Benin [68] was 68,92% in 2022 (likely higher among health workers).  
876 The Benin PCPs policy framework focuses on enhancing routine information systems rather than  
877 placing a significant emphasis on research, unlike other countries [42,46]. This lesser emphasis on  
878 research does not imply a lack of recognition that PCPs should engage in relevant research for their  
879 practice and community. Instead, it reflects a deliberate focus on establishing first a conducive  
880 environment with accessible and reliable data.

881

### 882 ***Professional identity and contextual aspects***

883 The Benin PCPs policy framework outlines seven fundamental values for PCPs and other primary  
884 care workers: respect for people, empathy, altruism, humility, professionalism, community  
885 orientation, and integrity. These values align with recognised core values for PCPs in Africa [13] and  
886 other regions [38], and many training programmes [38,42,46,69] address them. However, PCPS need  
887 to work within environments that nurture these values. Indeed, despite their best intentions, some  
888 PCPs find themselves in situations that conflict with the values they are supposed to embrace  
889 [32,70]. Hence, there is a need to establish a strong professional identity for PCPs. Building this  
890 professional identity requires an official status for PCPs. The latter can also help to make primary  
891 care attractive to young physicians, develop relevant training curricula, and better organise these  
892 practices [38,42].

893 Adapting health interventions and policies to the local context is a well-known principle in global  
894 health [36,38,55]. For instance, because of its limited resources and access to medicines, Cuba had

895 to develop its own training for PCPs, its own protocols of care, and its own care organisation [45,59].  
896 However, as tempting as it may be to copy the Cuban model because of its successes, it would be a  
897 mistake for Benin, given the two countries' very different political, social, historical, and cultural  
898 contexts. Similarly, given that Benin's resources are far from those of Western countries, copying  
899 and pasting models in these contexts is not an option either. Therefore, while integrating lessons  
900 from other settings, the Benin policy framework emphasises core elements related to PCP practices  
901 in Benin, as deemed relevant by multiple stakeholders and supported by context-related evidence.  
902 We also provided concrete examples of how these elements can be applied. However, as largely  
903 shown in previous paragraphs, several contextual specificities will require adaptation and sometimes  
904 choices among the various options proposed by the policy framework. This, in turn, requires sound  
905 leadership, a sufficient level of autonomy for PCPs, their team and local health authorities and a  
906 rigorous learning process [71]. Other context-related issues must be discussed further to see how  
907 the PCPs can adapt or cope with them. This is, for instance, the case of the wide use of alternative  
908 care providers in Benin [72] or the rapid population growth and urbanisation [73], resulting in the  
909 persistence or emergence of complex health problems. Finally, the policy framework should be  
910 regularly evaluated and updated, as is the case in many other contexts [38,45,51,56].

911

## 912 [Strengths and limitations](#)

913 The policy framework presented in this paper was developed through a meticulous cocreation  
914 process, using empirical data and analysis from multiple stakeholders. Moreover, we carefully  
915 compared the elements of the policy framework with existing international experiences, allowing for  
916 critical analysis to evaluate their scientific basis and feasibility.

917 In terms of limitations, the most obvious is that this policy framework is highly contextualised,  
918 needing adaptations for application to other countries. However, given the scientific basis  
919 underpinning it and that other African countries share similarities with Benin, the framework can  
920 serve as a valuable starting point for countries looking to guide PCPs' practices. Furthermore, the

921 West African regional context is currently undergoing profound changes, including the rise of  
922 terrorism, repeated *coups d'Etat* and an increasingly fragile socio-economic situation. The policy  
923 framework, as it stands, considers empirical data up to 2022 and the context up to 2023. It is difficult  
924 to predict how current geopolitical and socio-economic changes will impact the sustainability of its  
925 recommendations. Thus, we emphasise the importance of implementing the framework alongside  
926 continuous learning processes to ensure adaptability as circumstances evolve.

927

## 928 **Conclusion**

929 The cocreation process led to an evidence-informed and consensus-based policy framework for  
930 guiding PCPs' practices in Benin. This framework provides a roadmap to ensure a better contribution  
931 of PCPs to the improvement of Benin's PHC system compared to the current situation. The various  
932 interventions and recommendations presented in this framework must be tested, and a learning  
933 process is needed for continuous improvement. While the focus of the policy framework is on the  
934 case of Benin, the findings of the empirical work supporting it, the interventions recommended and  
935 many other aspects are of relevance to other countries facing similar contexts (low to lower-middle  
936 income, high mortality and morbidity, unregulated and poorly supported medical practices, need to  
937 improve the quality of care with limited resources, etc.), especially in francophone West Africa.

938

## 939 **Acknowledgements**

940 Our gratitude goes first to all participants in the various studies and activities that supported the  
941 cocreation process. We also thank the participants in the cocreation workshop for their useful  
942 reflections and the precious time they allocated to the development of the policy framework. We  
943 want to acknowledge the assistance provided by Harziki BOUKARI, Astrid FLENON, Cybèle  
944 HOUNMENO, and Armelle VIGAN GUEZODJE, who played pivotal roles in facilitating the workshop.  
945 Finally, we are grateful to Vanessa SEKPON for her invaluable support in facilitating and synthesising  
946 the workshop's data.



## 947 **References**

- 948 1. World Health Organization. The Global Health Observatory [cited 27 December 2023]. Available  
949 from: <https://www.who.int/data/gho/data/indicators/>.
- 950 2. Macinko J, Starfield B, Erinosh T. The impact of primary healthcare on population health in low-  
951 and middle-income countries. *J Ambul Care Manage*. 2009;32: 150–71. doi:  
952 10.1097/JAC.0b013e3181994221.
- 953 3. World Health Organization. Primary health care [cited 22 September 2023]. Available from:  
954 [https://www.who.int/health-topics/primary-health-care#tab=tab\\_1](https://www.who.int/health-topics/primary-health-care#tab=tab_1) .
- 955 4. Kringos DS, Boerma WGW, Hutchinson A, van der Zee J, Groenewegen PP. The Breadth of primary  
956 care. *BMC Health Serv Res*. 2010;10: 65. doi: <https://doi.org/10.1186/1472-6963-10-65>.
- 957 5. World Health Organization. Global strategy on human resources for health: Workforce 2030.  
958 Geneva: World Health Organization; 2016. Available from:  
959 <https://iris.who.int/bitstream/handle/10665/250368/9789241511131-eng.pdf?sequence=1>
- 960 6 . Eyal N, Cancedda C, Kyamanywa P, Hurst SA. Non-physician clinicians in sub-Saharan Africa and  
961 the evolving role of physicians. *Int J Health Policy Manag*. 2015;5(3):149-53. doi:  
962 10.15171/ijhpm.2015.215.
- 963 7. Willcox ML, Peersman W, Daou P, Diakité C, Bajunirwe F, Mubangizi V, et al. Human resources for  
964 primary health care in sub-Saharan Africa: progress or stagnation? *Hum Resour Health*.  
965 2015;13(76):1-11. doi: <https://doi.org/10.1186/s12960-015-0073-8>
- 966 8. Direction de la programmation et de la prospective. *Annuaire Statistiques Sanitaires du Bénin*  
967 2017. Cotonou: Ministère de la santé du Bénin; 2018.

- 968 9. Direction de la programmation et de la prospective. Annuaire des statistiques sanitaires 2010 du  
969 Bénin. Cotonou: Ministère de la Santé du Bénin; 2011.
- 970 10. Bello K, De Lepeleire J, Agossou C, Apers L, Zannou DM, Criel B. Lessons learnt from the  
971 experiences of primary care physicians facing COVID-19 in Benin: A mixed-methods study. *Frontiers*  
972 *in Health Services*. 2022;2: 11. doi: <https://doi.org/10.3389/frhs.2022.843058>.
- 973 11. Mash R, Howe A, Olayemi O, Makwero M, Ray S, Zerihun M, et al. Reflections on family medicine  
974 and primary healthcare in sub-Saharan Africa. *BMJ Glob Health*. 2018;3: e000662. doi:  
975 <https://doi.org/10.1136/bmjgh-2017-000662>.
- 976 12. Von Pressentin KB, Mash RJ, Baldwin-Ragaven L, Botha RPG, Govender I, Steinberg WJ. The  
977 bird's-eye perspective: how do district health managers experience the impact of family physicians  
978 within the South African district health system? A qualitative study. *South African Fam Pract*.  
979 2018;60(1):13-20. doi: 10.1080/20786190.2017.1348047.
- 980 13. Bello K, De Lepeleire J, Kabinda M. J, Bosongo S, Dossou J-P, Waweru E, et al. The expanding  
981 movement of primary care physicians operating at the first line of healthcare delivery systems in  
982 sub-Saharan Africa: A scoping review. *PLoS One*. 2021;16: e0258955. doi:  
983 [10.1371/journal.pone.0258955](https://doi.org/10.1371/journal.pone.0258955).
- 984 14. Jan T, Aillet S. De Tananarive au Caire : un aperçu du métier de médecin généraliste libéral dans  
985 le contexte des systèmes de santé locaux [Thèse de Médecine]. Bordeaux: Université Bordeaux 2 –  
986 Victor Segalen UFR des sciences médicales ; 2011. Available from : [https://bdsp-](https://bdsp-ehesp.inist.fr/vibad/index.php?action=getRecordDetail&idt=433735)  
987 [ehesp.inist.fr/vibad/index.php?action=getRecordDetail&idt=433735](https://bdsp-ehesp.inist.fr/vibad/index.php?action=getRecordDetail&idt=433735).
- 988 15. Bosongo SI, Mukalenge FC, Tambwe AM, Criel B. Les médecins prestataires à la première ligne  
989 des soins dans la ville de Kisangani en République Démocratique du Congo : vers une typologie. *Afr J*  
990 *Prim Health Care Fam Med*. 2021;13: 8. doi: 10.4102/phcfm.v13i1.2617.

- 991 16. World Health Organization, the United Nations Children’s Fund. Primary health care  
992 measurement framework and indicators: monitoring health systems through a primary health care  
993 lens. Geneva: World Health Organization; 2022. Available from:  
994 <https://iris.who.int/bitstream/handle/10665/352205/9789240044210-eng.pdf?sequence=1> .
- 995 17. Patnaik P. A policy framework towards the use of artificial intelligence by public institutions:  
996 Reference to FATE analysis. In: Saura JR, Debas F, editors. Handbook of Research on Artificial  
997 Intelligence in Government Practices and Processes. Hershey IGI Global; 2022. doi: 10.4018/978-1-  
998 7998-9609-8.ch002.
- 999 18. Criel B, Bello K, Tawaytibhongs O, Waweru E. The growing presence of medical doctors at first  
1000 line healthcare level in Benin, Thailand and Uganda: a multifaceted phenomenon. Berlin: The  
1001 European Conference of Family Doctors; 2020.
- 1002 19. Hansen PM, Synowiec C, Blanchet NJ. Co-production between researchers and policymakers is  
1003 critical for achieving health systems change. 2021 Feb 15 [cited 28 June 2023]. In: thebmjopinion  
1004 [Internet]. BMJ Journals: 2021. Available from [https://blogs.bmj.com/bmj/2021/02/15/co-  
1005 production-between-researchers-and-policymakers-is-critical-for-achieving-health-systems-change/](https://blogs.bmj.com/bmj/2021/02/15/co-production-between-researchers-and-policymakers-is-critical-for-achieving-health-systems-change/).
- 1006 20. Adams E, Bello K, Blanchet N, Dossou J-P, Issa A, Miller L, et al. How Togo recharted its path to  
1007 universal health coverage amid COVID-19 [cited 26 September 2023]. Washington: 2021. Available  
1008 from: [https://www.acceleratehss.org/2021/01/22/how-togo-recharted-its-path-to-universal-health-  
1009 coverage-amid-covid-19](https://www.acceleratehss.org/2021/01/22/how-togo-recharted-its-path-to-universal-health-coverage-amid-covid-19) .
- 1010 21. Redman S, Greenhalgh T, Adedokun L, Staniszewska S, Denegri S. Co-production of knowledge:  
1011 the future. BMJ. 2021;372 : n434. doi: 10.1136/bmj.n434.
- 1012 22. Rajan D, Adam T, El Husseiny D, Porignon D, Ghaffar A, Schmetts G. Policy dialogue : What it is  
1013 and how it can contribute to evidence-informed decision-making. Geneva: World Health

- 1014 Organization; 2015. Available from:
- 1015 <https://extranet.who.int/uhcpartnership/sites/default/files/reports/2015-Briefing-Note.pdf> .
- 1016 23. Partridge ACR, Mansilla C, Randhawa H, Lavis JN, El-Jardali F, Sewankambo NK. Lessons learned  
1017 from descriptions and evaluations of knowledge translation platforms supporting evidence-informed  
1018 policy-making in low- and middle-income countries: a systematic review. Health Res Policy Syst.  
1019 2020;18: 127.doi: <https://doi.org/10.1186/s12961-020-00626-5>.
- 1020 24. Shroff Z, Aulakh B, Gilson L, Agyepong IA, El-Jardali F, Ghaffar A. Incorporating research evidence  
1021 into decision-making processes: researcher and decision-maker perceptions from five low- and  
1022 middle-income countries. Health Res Policy Syst. 2015;13: 70. doi: 10.1186/s12961-015-0059-y.
- 1023 25. Robert E, Rajan D, Koch K, Weaver AM, Porignon D, Ridde V. Policy dialogue as a collaborative  
1024 tool for multistakeholder health governance: a scoping study. BMJ Glob Health. 2020;4: e002161.  
1025 doi: <https://doi.org/10.1136/bmjgh-2019-002161>.
- 1026 26. Marten R, El-Jardali F, Hafeez A, Hanefeld J, Leung GM, Ghaffar A. Co-producing the covid-19  
1027 response in Germany, Hong Kong, Lebanon, and Pakistan. BMJ. 2021;372: n243. doi:  
1028 <https://doi.org/10.1136/bmj.n243> .
- 1029 27. Loffreda G, Bello K, Kiendrénéogo JA, Selenou I, Ag Hamed MA, Dossou JP, et al. Political  
1030 economy analysis of universal health coverage and health financing reforms in low-and middle-  
1031 income countries: the role of stakeholder engagement in the research process. Health Res Policy Syst.  
1032 2021;19: 143.doi: <https://doi.org/10.1186/s12961-021-00788-w>.
- 1033 28. Ridde V, Dagenais C. What we have learnt (so far) about deliberative dialogue for evidence-based  
1034 policymaking in West Africa. BMJ Glob Health. 2017;2: e000432. doi:  
1035 <https://doi.org/10.1136/bmjgh-2017-000432>.

- 1036 29. Dovlo D, Nabyonga-orem J, Estrelli Y, Mwisongo A. Policy dialogues – the "bolts and joints" of  
1037 policy-making : experiences from Cabo Verde , Chad and Mali. BMC Health Serv Res. 2016;16: 216.  
1038 doi: <https://doi.org/10.1186/s12913-016-1455-x>.
- 1039 30. Meessen B, Akhnif ELH, Kiendrébéogo JA, Belghiti Alaoui A, Bello K, Bhattacharyya S, et al.  
1040 Learning for Universal Health Coverage. BMJ Glob Health. 2019;4(6): e002059.. doi: 10.1136/bmjgh-  
1041 2019-002059.
- 1042 31. El-Jardali F, Lavis J, Moat K, Pantoja T, Ataya N. Capturing lessons learned from evidence-to-  
1043 policy initiatives through structured reflection. Health Res Policy Sys. 2014;12: 1–15. doi:  
1044 <https://doi.org/10.1186/1478-4505-12-2>.
- 1045 32. Bello K, De Lepeleire J, Zannou DM, Criel B. Factors supporting the primary care physicians’  
1046 performance in Benin: a multiple case study. Cotonou: 2023.
- 1047 33. Delbecq AL, Van de Ven AH. A Group process model for problem identification and program  
1048 planning. J Appl Behav Sci. 1971;7: 466–92. <https://doi.org/10.1177/002188637100700404>.
- 1049 34. Donabedian A. Evaluating the quality of medical care. Milbank Q. 2005;83: 691–729. doi:  
1050 10.1111/j.1468-0009.2005.00397.x
- 1051 35. World Health Organization. Everybody’s business: Strengthening health systems to improve  
1052 health outcomes: WHO’s framework for action. Geneva: World Health Organization; 2007. Available  
1053 from: [https://iris.who.int/bitstream/handle/10665/43918/9789241596077\\_eng.pdf?sequence=1](https://iris.who.int/bitstream/handle/10665/43918/9789241596077_eng.pdf?sequence=1).
- 1054 36. Van Olmen J, Criel B, Bhojani U, Marchal B, Van Belle S; Chenge MF, et al. The health system  
1055 dynamics framework: the introduction of an analytical model for health system analysis and its  
1056 application to two case-studies. Health Cult Soc. 2012;2(1):1-21. doi: 10.5195/HCS.2012.71.

- 1057 37. Caza BB, Creary SJ. The construction of professional identity. In: Wilkinson A, Hislop D, Coupland  
1058 C, editors. Perspectives on contemporary professional work: Challenges and experiences.  
1059 Cheltenham :Edward Elgar Publishing; 2016. p. 259-85. <https://hdl.handle.net/1813/71987>.
- 1060 38. Wonca Europe. The European definition of general practice / family medicine- 2023 Edition.  
1061 Ljubljana: Wonca Europe; 2023. Available from: [https://www.woncaeurope.org/file/41f61fb9-47d5-](https://www.woncaeurope.org/file/41f61fb9-47d5-4721-884e-603f4afa6588/WONCA_European_Definitions_2_v7.pdf)  
1062 [4721-884e-603f4afa6588/WONCA\\_European\\_Definitions\\_2\\_v7.pdf](https://www.woncaeurope.org/file/41f61fb9-47d5-4721-884e-603f4afa6588/WONCA_European_Definitions_2_v7.pdf).
- 1063 39. Mills A, Palmer N, Gilson L, McIntyre D, Schneider H, Sinanovic E, et al. The performance of  
1064 different models of primary care provision in Southern Africa. Soc Sci Med. 2004 Sep;59(5):931-43.  
1065 DOI: 10.1016/j.socscimed.2003.12.015.
- 1066 40. Maison de la Société Civile du Bénin. Pétition pour l'amélioration des services de santé au Bénin :  
1067 des soins de qualité et l'accès aux médicaments essentiels. 2023 June 15 [Cited 18 November 2023].  
1068 Cotonou: 2023. Available from: <https://www.mdsbenin.org/sante/>.
- 1069 41. Global Respectful Maternity Care Council. Respectful maternity care: The universal rights of  
1070 women & newborns. Washington: White Ribbon Alliance ; 2019. Available from:  
1071 [https://whiteribbonalliance.org/wp-content/uploads/2022/05/WRA\\_RMC\\_Charter\\_FINAL.pdf](https://whiteribbonalliance.org/wp-content/uploads/2022/05/WRA_RMC_Charter_FINAL.pdf)
- 1072 42. Mash R. Reflections on the development of family medicine in the Western Cape: a 15-year  
1073 review. South African Fam Pract. 2011;53(6):557-62. doi: 10.1080/20786204.2011.10874152.
- 1074 43. Besigye IK, Onyango J, Ndoboli F, Hunt V, Haq C, Namatovu J. Roles and challenges of family  
1075 physicians in Uganda: a qualitative study. Afr J Prim Health Care Fam Med. 2019;11(1):1-9.  
1076 doi: 10.4102/PHCFM.V11I1.2009.

- 1077 44. Desplats D, Razakarison C. Le guide du Médecin Généraliste Communautaire. Marseille: Santé  
1078 Sud; 2011. Available from : [https://mediatheque.agencemicroprojets.org/wp-](https://mediatheque.agencemicroprojets.org/wp-content/uploads/Guide-medecin-generaliste-communautaire.pdf)  
1079 [content/uploads/Guide-medecin-generaliste-communautaire.pdf](https://mediatheque.agencemicroprojets.org/wp-content/uploads/Guide-medecin-generaliste-communautaire.pdf).
- 1080 45. Pineo R. Cuban Public Healthcare: A model of success for developing nations. J Dev Soc. 2019;35:  
1081 16–61. <https://doi.org/10.1177/0169796X19826731>.
- 1082 46. Frank JR, Snell L, Sherbino J, editors. CanMEDS 2015 Physician Competency Framework. Ottawa:  
1083 Royal College of Physicians and Surgeons of Canada; 2015. Available from:  
1084 [https://canmeds.royalcollege.ca/uploads/en/framework/CanMEDS%202015%20Framework\\_EN\\_Re-](https://canmeds.royalcollege.ca/uploads/en/framework/CanMEDS%202015%20Framework_EN_Reduced.pdf)  
1085 [duced.pdf](https://canmeds.royalcollege.ca/uploads/en/framework/CanMEDS%202015%20Framework_EN_Reduced.pdf).
- 1086 47. Moosa S, Downing R, Essuman A, Pentz S, Reid S, Mash R. African leaders' views on critical  
1087 human resource issues for the implementation of family medicine in Africa. Hum Resour Health.  
1088 2014 Jan;12(2):1-9. doi: 10.1186/1478-4491-12-2.
- 1089 48. Girdwood S, Govender K, Long L, Miot J, Meyer-Rath G. Primary healthcare delivery models for  
1090 uninsured low-income earners during the transition to National Health Insurance: perspectives of  
1091 private South African providers. S Afr Med J. 2019 Sep;109(10):771-83.  
1092 doi: 10.7196/SAMJ.2019.v109i10.13930.
- 1093 49. Christoffels R, Mash R. How well do public sector primary care providers function as medical  
1094 generalists in Cape Town: a descriptive survey. BMC Fam Pract. 2018 Jul;19(122): 1-9.  
1095 doi: 10.1186/s12875-018-0802-x.
- 1096 50. Desplats D, Koné Y, Razakarison C. Pour une médecine générale communautaire en première  
1097 ligne. Med Trop. 2004;64(6):539-44. French. DOI: 10.1055/s-0029-1237558.

- 1098 51. Reed G. Cuba's primary health care revolution: 30 years on. *Bull World Health Organ.* 2008;86(5):  
1099 327–9. doi: [10.2471/blt.08.030508](https://doi.org/10.2471/blt.08.030508).
- 1100 52. Moosa S. Family doctor leadership in African primary health care. *Afr J Prim Health Care Fam*  
1101 *Med* 2021;13: 1–2. doi: [10.4102/phcfm.v13i1.3198](https://doi.org/10.4102/phcfm.v13i1.3198).
- 1102 53. The African Forum for primary health care. Building effective primary health care teams for UHC  
1103 in Africa. Johannesburg: 2023. Available from : <https://afrophc.org/category/policy-framework/>
- 1104 54. Direction Départementale de la Santé du Borgou. Fiches de description de poste des acteurs de  
1105 la périphérie : Poste : médecin responsable du centre de santé. Parakou : DDS Borgou ; 2022.
- 1106 55. Moosa S. WONCA Africa: Introduction to family doctors [cited 1 March 2024]. Johannesburg:  
1107 2020. Available from: <https://profmoosa.com/wp-content/uploads/2020/02/wonca-africa-flyer.pdf>.
- 1108 56. OECD. Health care needs and organisation of primary health care in Brazil. In: *Primary Health*  
1109 *Care in Brazil*. Paris: OECD Reviews of Health Systems, OECD Publishing.  
1110 <https://doi.org/10.1787/120e170e-en>.
- 1111 57. Mash R, Ray S, Essuman A, Burgueño E. Community-orientated primary care: a scoping review of  
1112 different models, and their effectiveness and feasibility in sub-Saharan Africa. *BMJ Glob Health.*  
1113 2019;4: e001489. doi: <https://doi.org/10.1136/bmjgh-2019-001489>.
- 1114 58. Ministère de la santé du Bénin. Politique Nationale de la Santé Communautaire. Cotonou :  
1115 Ministère de la santé du Bénin ; 2015. Available from :  
1116 <https://www.medbox.org/document/politique-nationale-de-la-sante-communautaire#GO> .
- 1117 59. Lamrani S. The Health System in Cuba: Origin, Doctrine and Results. *Études caribéennes.* 2021;6.  
1118 doi: <https://doi.org/10.4000/etudescaribeennes.24110>.



- 1119 60. Delvaux N, Piessens V, De Burghgraeve T, Mamouris P, Vaes B, Vander Stichele R, et al. Clinical  
1120 decision support improves the appropriateness of laboratory test ordering in primary care without  
1121 increasing diagnostic error: the ELMO cluster randomised trial. *Implementation Sci.* 2020;15(100).  
1122 doi: <https://doi.org/10.1186/s13012-020-01059-y>.
- 1123 61. Fernandes Q, Augusto O, Uetela DM, Sherr K. Mozambique: Addressing neonatal mortality  
1124 through a peer-to-peer learning intervention at district level. In: Sheikh K, Abimbola S, editors.  
1125 Learning health systems: pathways to progress. Flagship report of the Alliance for Health Policy and  
1126 Systems Research. Geneva: World Health Organization; 2021. Available from:  
1127 <https://iris.who.int/bitstream/handle/10665/344891/9789240032217-eng.pdf?sequence=1>.
- 1128 62. Rice J, Hunter M, Kimathi G, Mukami D, Hetta R, Ntwiga I. Health workforce governance: Quality  
1129 an essential ingredient for enhanced health sector workforces in Africa. Nairobi: AMREF Africa; 2023.  
1130 Available from:  
1131 [https://repository.amref.ac.ke/bitstream/handle/20.500.14173/843/Quality%20An%20Essential%20](https://repository.amref.ac.ke/bitstream/handle/20.500.14173/843/Quality%20An%20Essential%20Ingredient%20for%20Enhanced%20Health%20Sector%20Workforces%20in%20Africa.pdf?sequence=1&isAllowed=y)  
1132 [Ingredient%20for%20Enhanced%20Health%20Sector%20Workforces%20in%20Africa.pdf?sequence](https://repository.amref.ac.ke/bitstream/handle/20.500.14173/843/Quality%20An%20Essential%20Ingredient%20for%20Enhanced%20Health%20Sector%20Workforces%20in%20Africa.pdf?sequence=1&isAllowed=y)  
1133 [=1&isAllowed=y](https://repository.amref.ac.ke/bitstream/handle/20.500.14173/843/Quality%20An%20Essential%20Ingredient%20for%20Enhanced%20Health%20Sector%20Workforces%20in%20Africa.pdf?sequence=1&isAllowed=y)
- 1134 63. Mash R, Reid S. Statement of consensus on Family Medicine in Africa. *Afr J Prim Health Care Fam*  
1135 *Med* 2010;2: 4–7. doi: 10.4102/phcfm.v2i1.151.
- 1136 64. World Health Organization, United Nations Children’s Fund. Operational framework for primary  
1137 health care: Transforming vision into action. Geneva: World Health Organization and the United  
1138 Nations Children’s Fund; 2020. Available from:  
1139 <https://iris.who.int/bitstream/handle/10665/337641/9789240017832-eng.pdf?sequence=1>.
- 1140 65. Nimpagaritse M, Korachais C, Meessen B. Effects in spite of tough constraints - A theory of  
1141 change based investigation of contextual and implementation factors affecting the results of a

- 1142 performance based financing scheme extended to malnutrition in Burundi. PLoS One. 2020;15(1):  
1143 e0226376. doi: <https://doi.org/10.1371/journal.pone.0226376>.
- 1144 66. Hellowell M, Myburgh A, Sjoblom M, Gurazada S, Clarke D. Covid-19 and the collapse of the  
1145 private health sector: a threat to countries' response efforts and the future of health systems  
1146 strengthening? Geneva: Health Systems Governance Collaborative; 2020. Available from:  
1147 [https://hsgovcollab.org/en/blog/covid-19-and-collapse-private-health-sector-threat-countries-](https://hsgovcollab.org/en/blog/covid-19-and-collapse-private-health-sector-threat-countries-response-efforts-and-future)  
1148 [response-efforts-and-future](https://hsgovcollab.org/en/blog/covid-19-and-collapse-private-health-sector-threat-countries-response-efforts-and-future) .
- 1149 67. Truyers C, Goderis G, Dewitte H, Akker M Vanden, Buntinx F. The Intego database: Background,  
1150 methods and basic results of a Flemish general practice-based continuous morbidity registration  
1151 project. BMC Med Inform Decis Mak. 2014;14(48). doi: <https://doi.org/10.1186/1472-6947-14-48>.
- 1152 68. Autorité de Régulation des Communications Électroniques et de la Poste (ARCEP). Observatoire  
1153 de l'Internet au Bénin : Tableau de bord au 31 Mars 2022. Cotonou: Arcep Bénin ; 2022. Available  
1154 from : [https://arcep.bj/wp-content/uploads/2022/06/Tableau-de-bord-Internet-au-31-Mars-](https://arcep.bj/wp-content/uploads/2022/06/Tableau-de-bord-Internet-au-31-Mars-2022.pdf)  
1155 [2022.pdf](https://arcep.bj/wp-content/uploads/2022/06/Tableau-de-bord-Internet-au-31-Mars-2022.pdf) .
- 1156 69. Van Dormael M. L'introduction des sciences sociales dans une expérience de formation  
1157 professionnelle des médecins de campagne au Mali. Colloque International Amades : Proceedings of  
1158 the international colloquium of Anthropology and Medicine; 2007 Oct 25-27; Marseille, France.  
1159 Available from :  
1160 [http://www.strengtheninghealthsystems.be/doc/3/ref%203.6%20=%20ref%202.14%20introduction](http://www.strengtheninghealthsystems.be/doc/3/ref%203.6%20=%20ref%202.14%20introduction%20des%20sciences%20sociales%20-%20Mali.pdf)  
1161 [%20des%20sciences%20sociales%20-%20Mali.pdf](http://www.strengtheninghealthsystems.be/doc/3/ref%203.6%20=%20ref%202.14%20introduction%20des%20sciences%20sociales%20-%20Mali.pdf).
- 1162 70. Van der Voort CTM, Van Kasteren G, Chege P, Dinant GJ. What challenges hamper Kenyan family  
1163 physicians in pursuing their family medicine mandate? A qualitative study among family physicians  
1164 and their colleagues. BMC Fam Pract. 2012 Apr;13(32):1-15 DOI: 10.1186/1471-2296-13-32.

1165 71. Sheikh K, Abimbola S, editors. Learning health systems: pathways to progress. Flagship report of  
1166 the Alliance for Health Policy and Systems Research. Geneva: World Health Organization; 2021.  
1167 Available from: [https://iris.who.int/bitstream/handle/10665/344891/9789240032217-](https://iris.who.int/bitstream/handle/10665/344891/9789240032217-eng.pdf?sequence=1)  
1168 [eng.pdf?sequence=1](https://iris.who.int/bitstream/handle/10665/344891/9789240032217-eng.pdf?sequence=1).

1169 72. Gryseels C, Dossou JP, Vigan A, Boyi Hounsou C, Kanhonou L, Benova L, et al. Where and why do  
1170 we lose women from the continuum of care in maternal health? A mixed-methods study in Southern  
1171 Benin. *Tropical Medicine and International Health* 2022;27: 236–43. doi: 10.1111/tmi.13729.

1172 73. The World Bank. DataBank: World Development Indicators [cited 09 August 2024]. Available  
1173 from: <https://databank.worldbank.org/reports.aspx?dsid=2&series=SP.URB.TOTL.IN.ZS>.

1174

1175 **Supporting information captions**

1176 S1 file: report of the cocreation workshop

1177 S2 file: Combination empirical and workshop data

1178

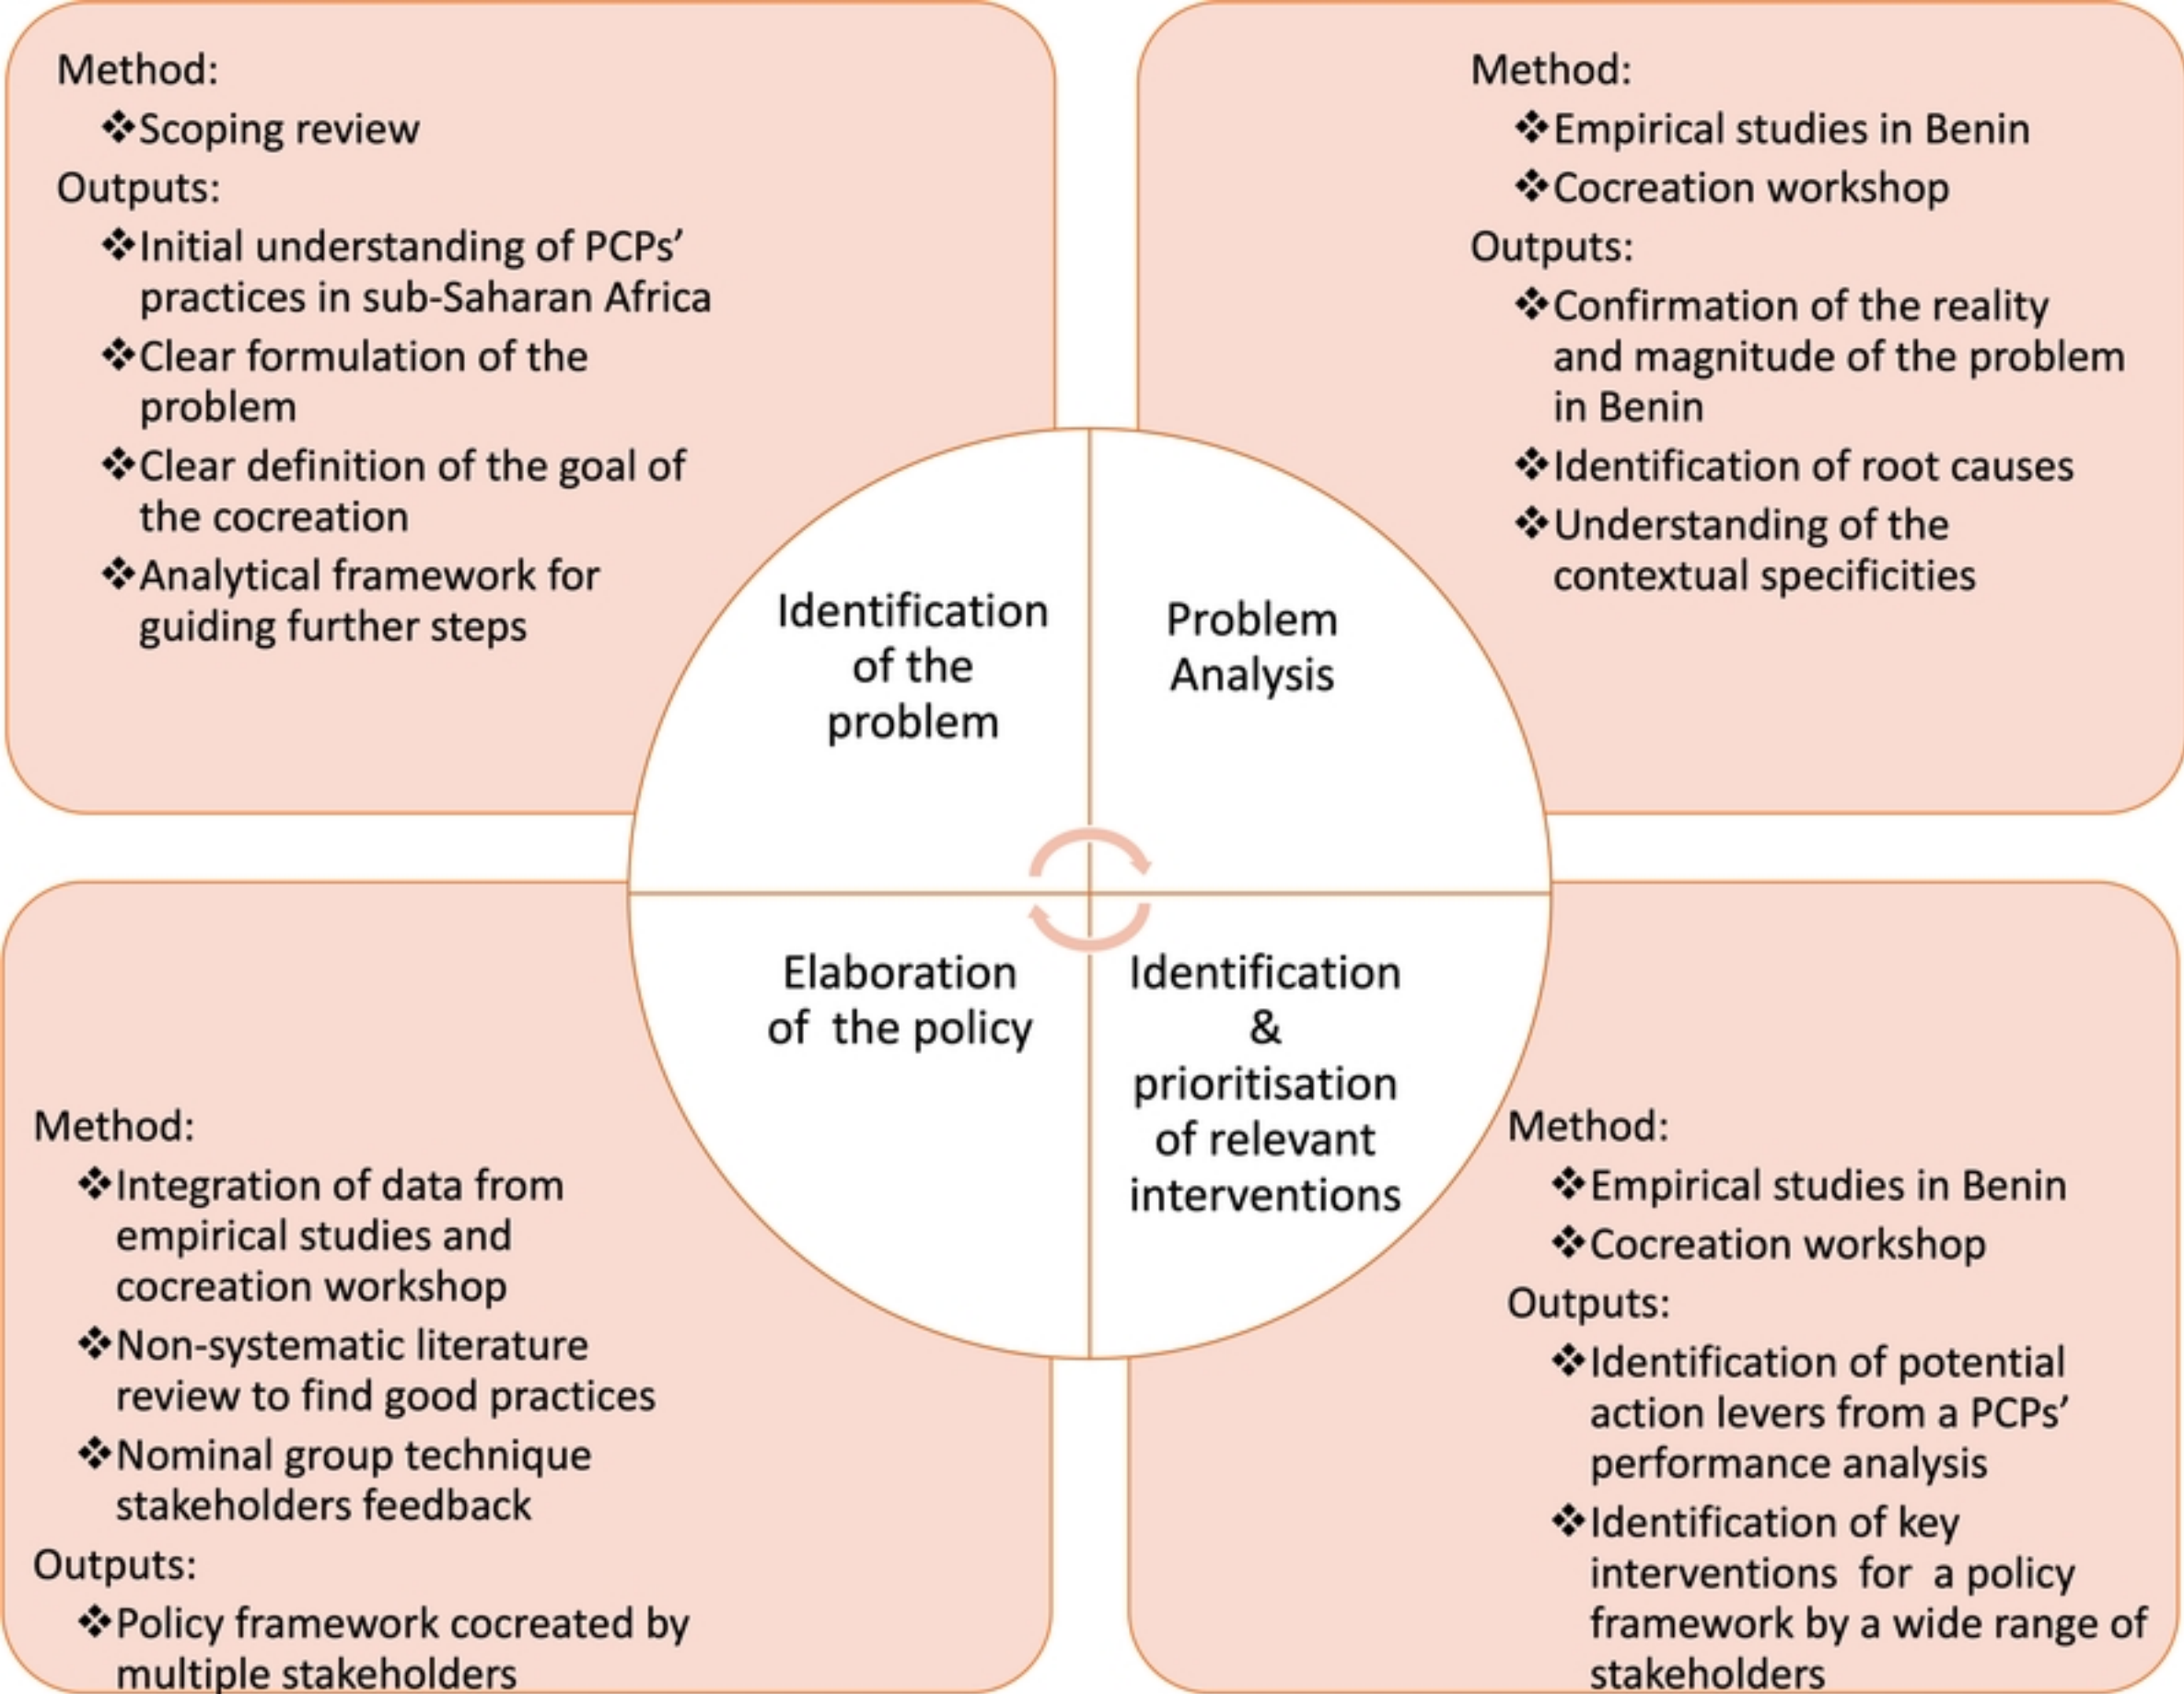

Figure

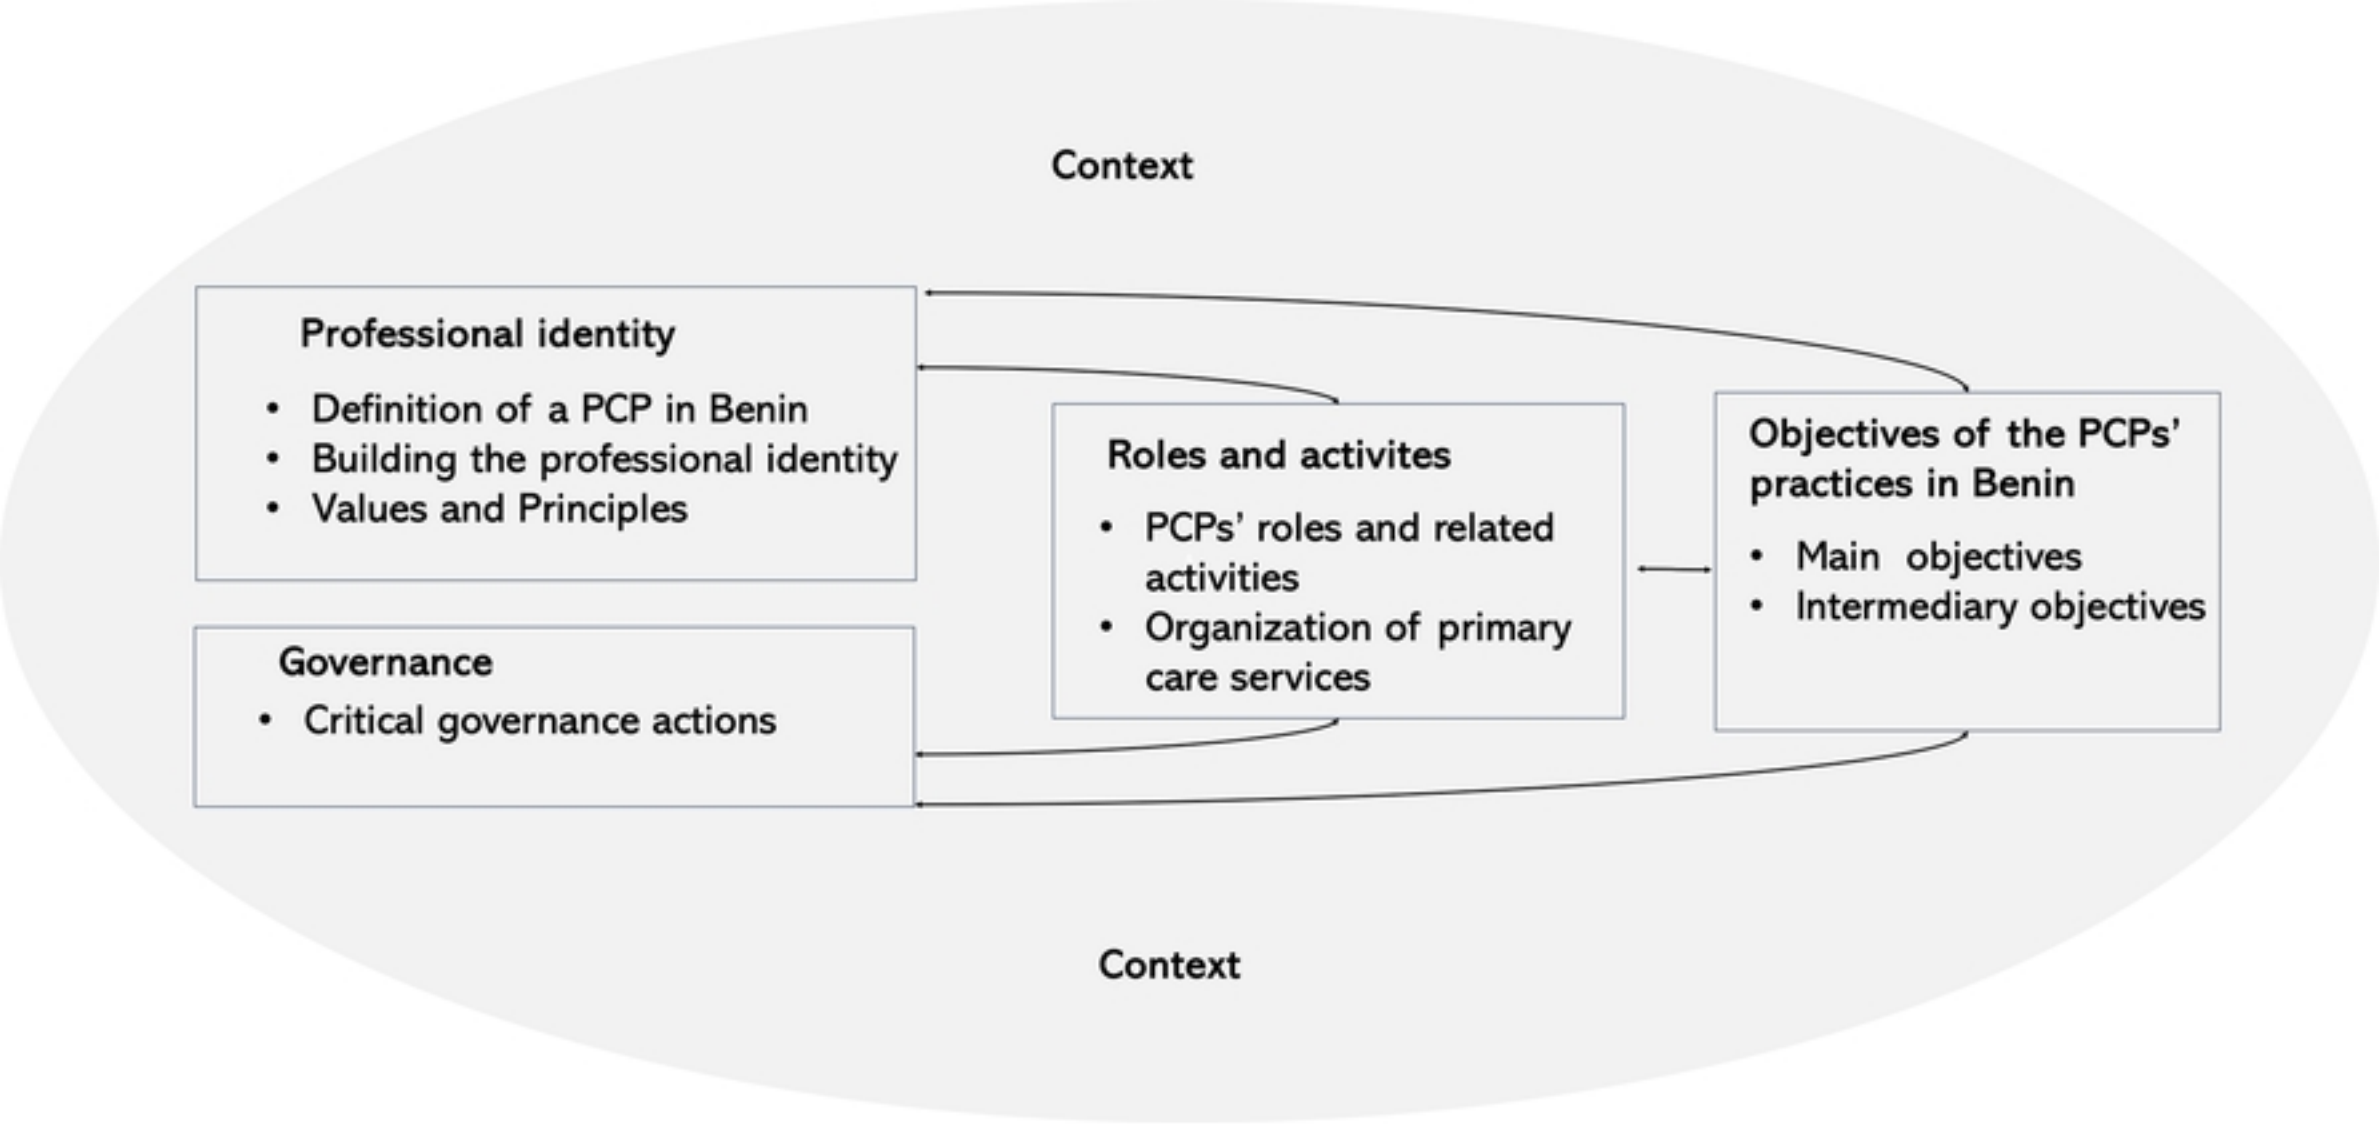

Figure

A primary care physician is a person who:

- holds a doctorate in medicine;
- practices partially or entirely at the first line of the healthcare system (i.e. at the interface between the healthcare system and the community);
- receives all categories of patients without any discrimination;
- whatever the nature of the institutional affiliation of the health facility (State, municipality/local government, community, non-governmental organization, individual, group of individuals).
